# Supplementary material
Source: ML conference proceedings conference paper supplement (https://proceedings.neurips.cc/paper_files/paper/2019/hash/8252831b9fce7a49421e622c14ce0f65-Abstract.html)
Supplement: Supplementary file [file 8252831b9fce7a49421e622c14ce0f65-Supplemental.zip]

---

# “Near-Optimal Reinforcement Learning in Dynamic Treatment Regimes” Supplemental Material

---

Anonymous Author(s)

Affiliation

Address

email

## 1 Appendix I. Proofs

2 In this section, we provide proofs for the theoretical results presented in the main text.

### 3 Proof of Theorems 1 to 3

4 We start by introducing necessary notations for the proof. We say an episode  $t$  is  $\epsilon$ -bad if  $V_{\pi^*}(M^*) - Y^t \geq \epsilon$ . Let  $T_\epsilon$  be the number of episodes taken by UC-DTR that are  $\epsilon$ -bad. Let  $L_\epsilon$  denote the indices of the  $\epsilon$ -bad episodes up to episode  $T$ . The cumulative regret  $R_\epsilon(T)$  in  $\epsilon$ -bad episodes up to episode  $T$  is defined as  $R_\epsilon(T) = \sum_{t \in L_\epsilon} V_{\pi^*}(M^*) - Y^t$ . For any  $k = 1, \dots, K$ , we define event counts  $N(\bar{s}_k, \bar{x}_k)$  in total episodes  $T$  as  $N(\bar{s}_k, \bar{x}_k) = \sum_{t=1}^T I_{\bar{s}_k^t = \bar{s}_k, \bar{x}_k^t = \bar{x}_k}$ . Finally, we denote by  $\mathcal{H}^t$  the history up to episode  $t$ , i.e.,  $\mathcal{H}^t = \{\bar{X}_K^1, \bar{S}_K^1, Y^1, \dots, \bar{X}_K^t, \bar{S}_K^t, Y^t\}$ .

10 **Lemma 2.** Fix  $\delta \in (0, 1)$ , with probability at least  $1 - \delta$ ,

$$\sum_{t \in L_\epsilon} (E_{\bar{x}_k^t} [Y | \bar{S}_K^t] - Y^t) \leq \sqrt{\frac{T_\epsilon \log(1/\delta)}{2}}.$$

11 *Proof.* Let  $\mathbf{D}^T$  denote the sequence  $\{\bar{X}_K^1, \bar{S}_K^1, \dots, \bar{X}_K^T, \bar{S}_K^T\}$ . Rewards  $Y^t$  are independent variables by conditioning on  $\mathbf{D}^T = \mathbf{d}^T$ . Applying Hoeffding’s inequality gives:

$$P\left(\sum_{t \in L_\epsilon} (E_{\bar{x}_k^t} [Y | \bar{S}_K^t] - Y^t) \geq \sqrt{\frac{T_\epsilon \log(1/\delta)}{2}} \mid \mathbf{d}^T\right) \leq \delta.$$

13 We thus have:

$$P\left(\sum_{t \in L_\epsilon} (E_{\bar{x}_k^t} [Y | \bar{S}_K^t] - Y^t) \geq \sqrt{\frac{T_\epsilon \log(1/\delta)}{2}} \mid \mathbf{d}^T\right) \leq \delta \sum_{\mathbf{d}^T} P(\mathbf{d}^T) = \delta. \quad \square$$

14 **Lemma 3.** Fix  $\epsilon > 0$ ,  $\delta \in (0, 1)$ . With probability (w.p.) of at least  $1 - \delta$ , it holds for any  $T > 1$ ,  
15  $R_\epsilon(T)$  of UC-DTR with parameter  $\delta$  is bounded by

$$R_\epsilon(T) \leq 12K \sqrt{|\mathcal{S}| |\mathcal{X}| T_\epsilon \log(2K |\mathcal{S}| |\mathcal{X}| T / \delta)} + 4K \sqrt{T_\epsilon \log(2T / \delta)}$$

16 *Proof.* Let  $M^*$  denote the underlying DTR. Recall that  $\mathcal{M}_t$  is a set of DTR instances such that for  
17 any  $M \in \mathcal{M}_t$ , its system dynamics satisfy

$$\left\| P_{\bar{x}_k}^M(\cdot | \bar{s}_k) - \hat{P}_{\bar{x}_k}^t(\cdot | \bar{s}_k) \right\|_1 \leq \sqrt{\frac{6 |\mathcal{S}_{k+1}| \log(2K |\mathcal{S}_k| |\mathcal{X}_k| t / \delta)}{\max\{1, N^t(\bar{s}_k, \bar{x}_k)\}}}, \quad (16)$$

$$\left| E_{\bar{x}_K}^M [Y | \bar{s}_K] - \hat{E}_{\bar{x}_K}^t [Y | \bar{s}_K] \right| \leq \sqrt{\frac{2 \log(2K |\mathcal{S}| |\mathcal{X}| t / \delta)}{\max\{1, N^t(\bar{s}_K, \bar{x}_K)\}}}. \quad (17)$$

18 By union bounds and Hoeffding's inequality (following a similar argument in [4, C.1]),

$$P(M^* \in \mathcal{M}_t) \leq \frac{\delta}{4t^2}.$$

19 Since  $\sum_{t=1}^{\infty} \frac{1}{4t^2} \leq \frac{\pi^2}{24} \delta < \frac{\delta}{2}$ , it follows that with probability at least  $1 - \frac{\delta}{2}$ ,  $M^* \in \mathcal{M}^t$  for all episodes  
20  $t = 1, 2, \dots$ .

21 For the remainder of the proof, we will assume that  $M^* \in \mathcal{M}_t$  for all  $t$ . Let  $E_{\bar{\mathbf{x}}_K}^{M_t}[Y|\bar{\mathbf{s}}_K]$  denote the  
22 conditional expected reward in the optimistic DTR  $M_t$ . We can write  $R_\epsilon(T)$  as:

$$R_\epsilon(T) = \sum_{t \in L_\epsilon} (V_{\pi^*}(M^*) - E_{\bar{\mathbf{x}}_K}^{M_t}[Y|\bar{\mathbf{s}}_K^t]) \quad (18)$$

$$+ \sum_{t \in L_\epsilon} (E_{\bar{\mathbf{x}}_K}^{M_t}[Y|\bar{\mathbf{s}}_K^t] - E_{\bar{\mathbf{x}}_K}[Y|\bar{\mathbf{s}}_K^t]) \quad (19)$$

$$+ \sum_{t \in L_\epsilon} (E_{\bar{\mathbf{x}}_K}[Y|\bar{\mathbf{s}}_K^t] - Y^t). \quad (20)$$

23 We will next derive bounds over  $R_\epsilon(T)$  by bounding quantities in Eqs. (18) to (20) separately.

24 **Bounding Eq. (18)** For any DTR  $M$  and policy  $\pi$ , let  $V_\pi(\bar{\mathbf{s}}_k, \bar{\mathbf{x}}_{k-1}; M) = E_\pi^M[Y|\bar{\mathbf{s}}_k, \bar{\mathbf{x}}_{k-1}]$  and  
25  $V_\pi(\bar{\mathbf{s}}_k, \bar{\mathbf{x}}_k; M) = E_\pi^M[Y|\bar{\mathbf{s}}_k, \bar{\mathbf{x}}_k]$ . Since  $M^* \in \mathcal{M}_t$ , we must have  $V_{\pi^*}(s_1; M^*) \leq V_{\pi_t}(s_1; M_t)$ ,  
26 i.e., the maximal expected reward of the optimal reward in the optimistic  $M_t$  is no less than that in  
27 the underlying DTR  $M^*$  for any initial state  $s_1$ . Further, since  $\pi_t$  is deterministic, for any stage  $k$   
28 and DTR  $M$ ,

$$V_{\pi_t}(\bar{\mathbf{s}}_k^t, \bar{\mathbf{x}}_{k-1}^t; M) = V_{\pi_t}(\bar{\mathbf{s}}_k^t, \bar{\mathbf{x}}_k^t; M). \quad (21)$$

29 We thus have

$$V_{\pi^*}(M^*) - E_{\bar{\mathbf{x}}_K}^{M_t}[Y|\bar{\mathbf{s}}_K^t] \leq V_{\pi^*}(M^*) - V_{\pi^*}(\bar{\mathbf{s}}_1^t; M^*) + V_{\pi_t}(\bar{\mathbf{s}}_1^t, \bar{\mathbf{x}}_1^t; M^*) - E_{\bar{\mathbf{x}}_K}^{M_t}[Y|\bar{\mathbf{s}}_K^t].$$

30 Let  $M_t(k)$  denote a combined DTR obtained from  $M^*$  and  $M_t$  such that

- 31 • for  $i = 0, 1, \dots, k-1$ , its transition probability  $P_{\bar{\mathbf{x}}_i}^{M_t(k)}(s_{i+1}|\bar{\mathbf{s}}_i)$  coincides with the transi-  
32 tion probability  $P_{\bar{\mathbf{x}}_i}(s_{i+1}|\bar{\mathbf{s}}_i)$  in the real DTR  $M^*$ ;
- 33 • for  $i = k, \dots, K-1$ , its transition probability  $P_{\bar{\mathbf{x}}_i}^{M_t(k)}(s_{i+1}|\bar{\mathbf{s}}_i)$  coincides with the transition  
34 probability  $P_{\bar{\mathbf{x}}_i}^{M_t}(s_{i+1}|\bar{\mathbf{s}}_i)$  in the optimistic  $M_t$

35 This is, for any  $\pi \in \Pi$ , the interventional distribution  $P_\pi^{M_t(k)}(\bar{\mathbf{x}}_K, \bar{\mathbf{s}}_K, y)$  factorizes as follows:

$$\begin{aligned} P_\pi^{M_t(k)}(\bar{\mathbf{x}}_K, \bar{\mathbf{s}}_K, y) &= P_{\bar{\mathbf{x}}_K}^{M_t}(y|\bar{\mathbf{s}}_K) \prod_{i=0}^{k-1} P_{\bar{\mathbf{x}}_i}(s_{i+1}|\bar{\mathbf{s}}_i) \\ &\quad \cdot \prod_{j=k}^{K-1} P_{\bar{\mathbf{x}}_j}^{M_t}(s_{i+1}|\bar{\mathbf{s}}_j) \prod_{l=1}^{K-1} \pi_{l+1}(x_{l+1}|\bar{\mathbf{s}}_{l+1}, \bar{\mathbf{x}}_l). \end{aligned} \quad (22)$$

36 Obviously,  $E_{\bar{\mathbf{x}}_K}^{M_t}[Y|\bar{\mathbf{s}}_K^t] = V_{\pi_t}(\bar{\mathbf{s}}_K^t, \bar{\mathbf{x}}_K^t; M_t^{(K)})$  and  $V_{\pi_t}(\bar{\mathbf{s}}_1^t, \bar{\mathbf{x}}_1^t; M_t) = V_{\pi_t}(s_1^t, x_1^t; M_t^{(1)})$ . We  
37 thus have

$$\begin{aligned} V_{\pi_t}(\bar{\mathbf{s}}_1^t, \bar{\mathbf{x}}_1^t; M_t) - E_{\bar{\mathbf{x}}_K}^{M_t}[Y|\bar{\mathbf{s}}_K^t] &= V_{\pi_t}(\bar{\mathbf{s}}_1^t, \bar{\mathbf{x}}_1^t; M_t^{(1)}) - V_{\pi_t}(\bar{\mathbf{s}}_K^t, \bar{\mathbf{x}}_K^t; M_t^{(K)}) \\ &= \sum_{k=1}^{K-1} V_{\pi_t}(\bar{\mathbf{s}}_k^t, \bar{\mathbf{x}}_k^t; M_t^{(1)}) - V_{\pi_t}(\bar{\mathbf{s}}_{k+1}^t, \bar{\mathbf{x}}_{k+1}^t; M_t^{(K)}) \\ &= \sum_{k=1}^{K-1} V_{\pi_t}(\bar{\mathbf{s}}_k^t, \bar{\mathbf{x}}_k^t; M_t^{(1)}) - V_{\pi_t}(\bar{\mathbf{s}}_{k+1}^t, \bar{\mathbf{x}}_k^t; M_t^{(K)}). \end{aligned}$$

38 The last step is ensured by Eq. (21). We further have:

$$\begin{aligned} V_{\pi_t}(\bar{\mathbf{S}}_1^t, \bar{\mathbf{X}}_1^t; M_t) - E_{\bar{\mathbf{X}}_K^t}^{M_t}[Y|\bar{\mathbf{S}}_K^t] &= \sum_{k=1}^{K-1} V_{\pi_t}(\bar{\mathbf{S}}_k^t, \bar{\mathbf{X}}_k^t; M_t^{(k)}) - V_{\pi_t}(\bar{\mathbf{S}}_k^t, \bar{\mathbf{X}}_k^t; M_t^{(k+1)}) \\ &\quad + \sum_{k=1}^{K-1} V_{\pi_t}(\bar{\mathbf{S}}_k^t, \bar{\mathbf{X}}_k^t; M_t^{(k+1)}) - V_{\pi_t}(\bar{\mathbf{S}}_{k+1}^t, \bar{\mathbf{X}}_k^t; M_t^{(k+1)}). \end{aligned}$$

39 Eq. (18) can thus be written as:

$$\sum_{t \in L_\epsilon} (V_{\pi_t}(M_t) - E_{\bar{\mathbf{X}}_K^t}^{M_t}[Y|\bar{\mathbf{S}}_K^t]) = \sum_{k=1}^{K-1} \sum_{t \in L_\epsilon} V_{\pi_t}(\bar{\mathbf{S}}_k^t, \bar{\mathbf{X}}_k^t; M_t^{(k)}) - V_{\pi_t}(\bar{\mathbf{S}}_k^t, \bar{\mathbf{X}}_k^t; M_t^{(k+1)}) + \sum_{t \in L_\epsilon} Z_t,$$

40 where  $Z_t$  is defined as

$$Z_t = V_{\pi^*}(M^*) - V_{\pi^*}(\bar{\mathbf{S}}_1^t; M) + \sum_{k=1}^{K-1} V_{\pi_t}(\bar{\mathbf{S}}_k^t, \bar{\mathbf{X}}_k^t; M_t^{(k+1)}) - V_{\pi_t}(\bar{\mathbf{S}}_{k+1}^t, \bar{\mathbf{X}}_k^t; M_t^{(k+1)})$$

41 By Eq. (22) and basic probabilistic operations,

$$\begin{aligned} &V_{\pi_t}(\bar{\mathbf{S}}_k^t, \bar{\mathbf{X}}_k^t; M_t^{(k)}) - V_{\pi_t}(\bar{\mathbf{S}}_k^t, \bar{\mathbf{X}}_k^t; M_t^{(k+1)}) \\ &= \sum_{s_{k+1}} (P^{M_t}(s_{k+1}|\bar{\mathbf{S}}_k, \bar{\mathbf{X}}_k) - P(s_{k+1}|\bar{\mathbf{S}}_k, \bar{\mathbf{X}}_k)) V_{\pi_t}(s_{k+1}, \bar{\mathbf{S}}_k^t, \bar{\mathbf{X}}_k^t; M_t) \\ &\leq \left\| P_{\bar{\mathbf{x}}_k}^{M_t}(\cdot|\bar{\mathbf{s}}_k) - P_{\bar{\mathbf{x}}_k}(\cdot|\bar{\mathbf{s}}_k) \right\|_1 \max_{s_{k+1}} V_{\pi_t}(s_{k+1}, \bar{\mathbf{S}}_k^t, \bar{\mathbf{X}}_k^t; M_t) \\ &\leq 2\sqrt{6|\mathcal{S}_{k+1}| \log(2K|\bar{\mathbf{S}}_k||\bar{\mathbf{X}}_k|T/\delta)} \frac{1}{\sqrt{\max\{1, N^t(\bar{\mathbf{S}}_k^t, \bar{\mathbf{X}}_k^t)\}}} \end{aligned}$$

42 The last step follows from Eq. (16). From results in [4, D], we have

$$\sum_{t \in L_\epsilon} \frac{1}{\sqrt{\max\{1, N^t(\bar{\mathbf{S}}_k^t, \bar{\mathbf{X}}_k^t)\}}} \leq (\sqrt{2} + 1) \sqrt{T_\epsilon |\bar{\mathbf{S}}_k| |\bar{\mathbf{X}}_k|}.$$

43 This implies:

$$\begin{aligned} &\sum_{t \in L_\epsilon} \sum_{k=1}^{K-1} V_{\pi_t}(\bar{\mathbf{S}}_k^t, \bar{\mathbf{X}}_k^t; M_t^{(k)}) - V_{\pi_t}(\bar{\mathbf{S}}_k^t, \bar{\mathbf{X}}_k^t; M_t^{(k+1)}) \\ &\leq \sum_{k=1}^{K-1} 2(\sqrt{2} + 1) \sqrt{6T_\epsilon |\bar{\mathbf{S}}_{k+1}| |\bar{\mathbf{X}}_k| \log(2K|\bar{\mathbf{S}}_k||\bar{\mathbf{X}}_k|T/\delta)} \\ &\leq 2(\sqrt{2} + 1)(K-1) \sqrt{6T_\epsilon |\mathcal{S}| |\mathcal{X}| \log(2K|\mathcal{S}| |\mathcal{X}| T/\delta)} \end{aligned} \quad (23)$$

44 Let  $\mathcal{H}^t$  denote the history up to episode  $t$ , i.e.,  $\{\bar{\mathbf{X}}_K^1, \bar{\mathbf{S}}_K^1, Y^1, \dots, \bar{\mathbf{X}}_K^t, \bar{\mathbf{S}}_K^t, Y^t\}$ . Since  $|Z_t| \leq K$   
 45 and  $E[Z_{t+1}|\mathcal{H}_t] = 0$ ,  $\{Z_t : t \in L_\epsilon\}$  is a sequence of martingale differences. By Azuma-Hoeffding  
 46 inequality [3], we have, with probability at least  $1 - \frac{\delta}{8T^2}$ ,

$$\sum_{t \in L_\epsilon} Z_t \leq K \sqrt{6T_\epsilon \log(2T/\delta)} \quad (24)$$

47 Since  $\sum_{T=1}^\infty \frac{1}{8T^2} \leq \frac{\pi^2}{48} \delta < \frac{\delta}{4}$ , the above inequality holds with probability  $1 - \frac{\delta}{4}$  for all  $T > 1$ .  
 48 Eqs. (23) and (24) combined give

$$\begin{aligned} &\sum_{t \in L_\epsilon} (V_{\pi^*}(M^*) - E_{\bar{\mathbf{X}}_K^t}^{M_t}[Y|\bar{\mathbf{S}}_K^t]) \\ &\leq 2(\sqrt{2} + 1)(K-1) \sqrt{6T_\epsilon |\mathcal{S}| |\mathcal{X}| \log(2K|\mathcal{S}| |\mathcal{X}| T/\delta)} + K \sqrt{6T_\epsilon \log(2T/\delta)} \end{aligned} \quad (25)$$

49 **Bounding Eq. (19)** Since both  $M^*, M_t$  are in the set  $\mathcal{M}_t$ ,

$$\begin{aligned} E_{\bar{\mathbf{X}}_K^t}^{M_t}[Y|\bar{\mathbf{S}}_K^t] - E_{\bar{\mathbf{X}}_K^t}[Y|\bar{\mathbf{S}}_K^t] &\leq \left| E_{\bar{\mathbf{x}}_K}^{M_t}[Y|\bar{\mathbf{s}}_K] - \hat{E}_{\bar{\mathbf{x}}_K}^t[Y|\bar{\mathbf{s}}_K] \right| + \left| E_{\bar{\mathbf{X}}_K^t}[Y|\bar{\mathbf{S}}_K^t] - \hat{E}_{\bar{\mathbf{x}}_K}^t[Y|\bar{\mathbf{s}}_K] \right| \\ &\leq 2\sqrt{2\log(2K|\mathcal{S}||\mathcal{X}|T/\delta)} \frac{1}{\sqrt{\max\{1, N^t(\bar{\mathbf{S}}_K^t, \bar{\mathbf{X}}_K^t)\}}} \end{aligned}$$

50 The last step follows from Eq. (17). From results in [4, D], we have

$$\sum_{t \in L_\epsilon} \frac{1}{\sqrt{\max\{1, N^t(\bar{\mathbf{S}}_K^t, \bar{\mathbf{X}}_K^t)\}}} \leq (\sqrt{2} + 1)\sqrt{T_\epsilon|\mathcal{S}||\mathcal{X}|}.$$

51 This implies

$$\sum_{t \in L_\epsilon} (E_{\bar{\mathbf{X}}_K^t}^{M_t}[Y|\bar{\mathbf{S}}_K^t] - E_{\bar{\mathbf{X}}_K^t}[Y|\bar{\mathbf{S}}_K^t]) \leq 2(\sqrt{2} + 1)\sqrt{2T_\epsilon|\mathcal{S}||\mathcal{X}|\log(2K|\mathcal{S}||\mathcal{X}|T/\delta)} \quad (26)$$

52 **Bounding Eq. (20)** By Lem. 2, we have with probability at least  $1 - \frac{\delta}{8T^2}$ ,

$$\sum_{t \in L_\epsilon} (E_{\bar{\mathbf{X}}_K^t}[Y|\bar{\mathbf{S}}_K^t] - Y^t) \leq \sqrt{\frac{3T_\epsilon \log(2T/\delta)}{2}} \quad (27)$$

53 Since  $\sum_{T=1}^\infty \frac{1}{8T^2} \leq \frac{\pi^2}{48} \delta < \frac{\delta}{4}$ , the above equation holds with probability  $1 - \frac{\delta}{4}$  for any  $T$ .

54 Eqs. (25) to (27) together give that, with probability at least  $1 - \frac{\delta}{2} - \frac{\delta}{4} - \frac{\delta}{4} = 1 - \delta$ ,

$$\begin{aligned} R_\epsilon(T) &\leq (K-1)2(\sqrt{2}+1)\sqrt{6T_\epsilon|\mathcal{S}||\mathcal{X}|\log(2K|\mathcal{S}||\mathcal{X}|T/\delta)} + K\sqrt{6T_\epsilon \log(2T/\delta)} \\ &\quad + 2(\sqrt{2}+1)\sqrt{2T_\epsilon|\mathcal{S}||\mathcal{X}|\log(2K|\mathcal{S}||\mathcal{X}|T/\delta)} + \sqrt{\frac{3T_\epsilon \log(2T/\delta)}{2}}. \end{aligned}$$

55 A quick simplification gives:

$$R_\epsilon(T) \leq 12K\sqrt{|\mathcal{S}||\mathcal{X}|T_\epsilon \log(2K|\mathcal{S}||\mathcal{X}|T/\delta)} + 4K\sqrt{T_\epsilon \log(2T/\delta)}. \quad \square$$

56 **Theorem 1.** Fix a  $\delta \in (0, 1)$ . With probability (w.p.) of at least  $1 - \delta$ , it holds for any  $T > 1$ , the  
57 regret of UC-DTR with parameter  $\delta$  is bounded by

$$R(T) \leq 12K\sqrt{|\mathcal{S}||\mathcal{X}|T \log(2K|\mathcal{S}||\mathcal{X}|T/\delta)} + 4K\sqrt{T \log(2T/\delta)}.$$

58 *Proof.* Fix  $\epsilon = 0$ . Naturally,  $T_\epsilon = T$  and  $R_\epsilon(T) = R(T)$ . By Lem. 3,

$$R(T) \leq 12K\sqrt{|\mathcal{S}||\mathcal{X}|T \log(2K|\mathcal{S}||\mathcal{X}|T/\delta)} + 4K\sqrt{T \log(2T/\delta)}. \quad \square$$

59 **Theorem 2.** For any  $T \geq 1$ , with parameter  $\delta = \frac{1}{T}$ , the expected regret of UC-DTR is bounded by

$$E[R(T)] \leq \max_{\pi \in \Pi^-} \left\{ \frac{33^2 K^2 |\mathcal{S}||\mathcal{X}| \log(T)}{\Delta_\pi} + \frac{32}{\Delta_\pi^3} + \frac{4}{\Delta_\pi} \right\} + 1.$$

60 *Proof.* By Lem. 3 and a quick simplification, we have

$$R_\epsilon(T) \leq 23K\sqrt{|\mathcal{S}||\mathcal{X}|T_\epsilon \log(T/\delta)}.$$

61 Since  $R_\epsilon(T) \geq \epsilon T_\epsilon$ ,  $\epsilon T_\epsilon \leq 23K\sqrt{|\mathcal{S}||\mathcal{X}|T_\epsilon \log(T/\delta)}$ , which implies

$$T_\epsilon \leq \frac{23^2 K^2 |\mathcal{S}||\mathcal{X}| \log(T/\delta)}{\epsilon^2}. \quad (28)$$

62 This implies that, with probability at least  $1 - \delta$ ,

$$R_\epsilon(T) \leq 23K\sqrt{|\mathcal{S}||\mathcal{X}|T_\epsilon \log(T/\delta)} = \frac{23^2 K^2 |\mathcal{S}||\mathcal{X}| \log(T/\delta)}{\epsilon}$$

Let  $\Delta = \arg \min_{\pi \in \Pi} \Delta_{\pi}$ . Fix  $\epsilon = \frac{\Delta}{2}$ ,  $\delta = \frac{1}{T}$ , we have

$$E[R_{\frac{\Delta}{2}}(T)] \leq \frac{33^2 K^2 |\mathcal{S}| |\mathcal{X}| \log(T)}{\Delta} + 1. \quad (29)$$

We now only need to bound the regrets cumulated in the episodes that are not  $\epsilon$ -bad, which we call  $\epsilon$ -good. Let  $\tilde{R}_{\epsilon}(T)$  denote the regret in episodes that are  $\epsilon$ -good. Let  $\tilde{T}_{\epsilon}$  denote the total number of  $\epsilon$ -good episodes and let  $\tilde{L}_{\epsilon}$  be indices of  $\epsilon$ -good episodes. Fix  $\epsilon = \frac{\Delta}{2}$ , for any  $\epsilon$ -good episode  $t$ , we have  $V_{\pi_t}(M^*) - Y^t < \epsilon$ . Fix event  $\tilde{T}_{\frac{\Delta}{2}} = t$ ,

$$\tilde{R}_{\epsilon}(T) = \sum_{i \in \tilde{L}_{\epsilon}} V_{\pi^*}(M^*) - Y^i \leq t \frac{\Delta}{2}.$$

The above inequality is equivalent to

$$\begin{aligned} \sum_{i \in \tilde{L}_{\frac{\Delta}{2}}} V_{\pi^*}(M^*) - V_{\pi_i}(M^*) - Y^i &\leq t \frac{\Delta}{2} - \sum_{i \in \tilde{L}_{\frac{\Delta}{2}}} V_{\pi_i}(M^*) \\ \Rightarrow \sum_{i \in \tilde{L}_{\frac{\Delta}{2}}} \Delta_{\pi_i} - Y^i &\leq t \frac{\Delta}{2} - \sum_{i \in \tilde{L}_{\frac{\Delta}{2}}} V_{\pi_i}(M^*) \\ \Rightarrow \sum_{i \in \tilde{L}_{\frac{\Delta}{2}}} \Delta - Y^i &\leq t \frac{\Delta}{2} - \sum_{i \in \tilde{L}_{\frac{\Delta}{2}}} V_{\pi_i}(M^*) \end{aligned}$$

Since  $|\tilde{L}_{\epsilon}| = \tilde{T}_{\frac{\Delta}{2}}$ , we have

$$\tilde{T}_{\frac{\Delta}{2}} = t \Rightarrow \sum_{i \in \tilde{L}_{\frac{\Delta}{2}}} V_{\pi_i}(M^*) - Y^i \leq -t \frac{\Delta}{2}. \quad (30)$$

We could thus bound  $E[\tilde{R}_{\frac{\Delta}{2}}(T)]$  as

$$E[\tilde{R}_{\frac{\Delta}{2}}(T)] \leq \frac{\Delta}{2} E[\tilde{T}_{\frac{\Delta}{2}}(T)] \leq \frac{\Delta}{2} \sum_{t=1}^T t P(\tilde{T}_{\frac{\Delta}{2}} = t)$$

By Eq. (30), we further have

$$E[\tilde{R}_{\frac{\Delta}{2}}(T)] \leq \frac{\Delta}{2} \sum_{t=1}^T t P\left(\sum_{i \in \tilde{L}_{\frac{\Delta}{2}}} V_{\pi_i}(M^*) - Y^i \leq -t \frac{\Delta}{2}\right)$$

Let  $C_t = V_{\pi_t}(M^*) - Y^t$ . Since  $|C_t| < 1$  and  $E[C_{t+1} | \mathcal{H}^t] = 0$ ,  $\{C_i : i \in \tilde{L}_{\frac{\Delta}{2}}\}$  is a sequence of martingale differences. Applying Azuma-Hoeffding lemma gives,

$$P\left(\sum_{i \in \tilde{L}_{\frac{\Delta}{2}}} C_i \leq -t \frac{\Delta}{2}\right) \leq e^{-\frac{\Delta^2 t}{8}}.$$

Thus

$$E[\tilde{R}_{\frac{\Delta}{2}}(T)] \leq \frac{\Delta}{2} \sum_{t=1}^T t e^{-\frac{\Delta^2 t}{8}} \leq \frac{\Delta}{2} \frac{64}{\Delta^4} \left(\frac{\Delta^2}{8} + 1\right) e^{-\frac{\Delta^2}{8}}$$

which implies

$$E[\tilde{R}_{\frac{\Delta}{2}}(T)] \leq \frac{32}{\Delta^3} + \frac{4}{\Delta}. \quad (31)$$

Eqs. (29) and (31) together give:

$$E[R(T)] = E[R_{\frac{\Delta}{2}}(T)] + E[\tilde{R}_{\frac{\Delta}{2}}(T)] \leq \frac{33^2 K^2 |\mathcal{S}| |\mathcal{X}| \log(T)}{\Delta} + \frac{32}{\Delta^3} + \frac{4}{\Delta} + 1$$

The right-hand side of the above inequality is a decreasing function regarding the gap  $\Delta$ . By a quick simplification, we prove the statement.  $\square$

**Theorem 3.** For any algorithm  $\mathcal{A}$ , any natural numbers  $K \geq 1$ , and  $|\mathcal{S}^k| \geq 2, |\mathcal{X}^k| \geq 2$  for any  $k \in \{1, \dots, K\}$ , there is a DTR  $M$  with horizon  $K$ , state domains  $\mathcal{S}$  and action domains  $\mathcal{X}$ , such that the expected regret of  $\mathcal{A}$  after  $T \geq |\mathcal{S}||\mathcal{X}|$  episodes is at least

$$E[R(T)] \geq 0.05 \sqrt{|\mathcal{S}||\mathcal{X}|T}.$$

*Proof.* The classic results in bandit literature [1, Thm. 5.1] shows that for each state sequence  $K$ , there exists a bandit instance such that for any the total regret of any algorithm is lower bound by

$$E[R(T)] \geq 0.05 \sum_{\bar{s}_K} \sqrt{N(\bar{s}_K)|\mathcal{X}|},$$

where  $N(\bar{s}_K)$  is the event count  $\bar{S}_K = \bar{s}_K$  for all  $T$  episodes. The lower bound in Thm. 3 is achieved when all states  $K$  are decided uniformly at random, i.e.,  $N(\bar{s}_K) = T/|\bar{\mathcal{S}}_K|$ .  $\square$

## Proofs of Theorems 4 to 6, Lemma 1, and Corollary 2

In this section, we provide proofs for the bounds on transition probabilities of DTRs. Our proofs build on the notion of counterfactual variables [6, Ch. 7.1] and axioms of “composition, effectiveness and reversibility” defined in [6, Ch. 7.3.1].

For a SCM  $M$ , arbitrary subsets of endogenous variables  $\mathbf{X}, \mathbf{Y}$ , the potential outcome of  $\mathbf{Y}$  to intervention  $do(\mathbf{x})$ , denoted by  $\mathbf{Y}_{\mathbf{x}}(\mathbf{u})$ , is the solution for  $\mathbf{Y}$  with  $\mathbf{U} = \mathbf{u}$  in the sub-model  $M_{\mathbf{x}}$ . It can be read as the counterfactual sentence “the value that  $\mathbf{Y}$  would have obtained in situation  $\mathbf{U} = \mathbf{u}$ , had  $\mathbf{X}$  been  $\mathbf{x}$ .” Statistically, averaging  $\mathbf{u}$  over the distribution  $P(\mathbf{u})$  leads to the counterfactual variables  $\mathbf{Y}_{\mathbf{x}}$ . We denote  $P(\mathbf{Y}_{\mathbf{x}})$  a distribution over counterfactual variables  $\mathbf{Y}_{\mathbf{x}}$ . We use  $P(\mathbf{y}_{\mathbf{x}})$  as a shorthand for probabilities  $P(\mathbf{Y}_{\mathbf{x}} = \mathbf{y})$  when the identify of the counterfactual variables is clear.

We now introduce a family of DTRs which represent the exogenous variables  $\mathbf{U}$  using partitions defined by the corresponding counterfactual variables. For any  $k = 1, \dots, K-1$ , let  $S_{k+1, \bar{\mathbf{x}}_k}$  denote a set of counterfactual variables  $\{S_{k+1, \bar{\mathbf{x}}_k} : \bar{\mathbf{x}}_k \in \bar{\mathcal{X}}_k\}$ . Similarly, let  $Y_{\bar{\mathcal{X}}_K}$  denote a set  $\{Y_{\bar{\mathbf{x}}_K} : \bar{\mathbf{x}}_K \in \bar{\mathcal{X}}_K\}$ . Further, we define  $\bar{\mathcal{S}}_{k+1, \bar{\mathcal{X}}_k}$  a set  $\{S_1, S_{2, \bar{\mathbf{x}}_1}, \dots, S_{k+1, \bar{\mathbf{x}}_k}\}$ .

**Definition 1** (Counterfactual DTR). A counterfactual dynamic treatment regime is a DTR  $\langle \mathbf{U}, \{\bar{\mathcal{X}}_K, \bar{\mathcal{S}}_K, \mathbf{Y}\}, \mathbf{F}, P(\mathbf{u}) \rangle$  where for  $k = 2, \dots, K$ ,

- The exogenous variables  $\mathbf{U} = \{\bar{\mathcal{X}}_K, \bar{\mathcal{S}}_{K, \bar{\mathcal{X}}_{K-1}}, Y_{\bar{\mathcal{X}}_K}\}$ ;
- Values of  $S_1, \bar{\mathcal{X}}_K$  are drawn from  $P(\bar{\mathcal{X}}_K, \bar{\mathcal{S}}_{K, \bar{\mathcal{X}}_{K-1}}, Y_{\bar{\mathcal{X}}_K})$ ;
- Values of  $S_k$  are decided by a function  $S_k \leftarrow \tau_k(S_{k, \bar{\mathcal{X}}_{k-1}}, \bar{\mathcal{X}}_{k-1}) = S_{k, \bar{\mathcal{X}}_{k-1}}$ ;
- Values of  $\mathbf{Y}$  are decided by a function  $\mathbf{Y} \leftarrow r(\mathbf{Y}_{\bar{\mathcal{X}}_K}, \bar{\mathcal{X}}_K) = \mathbf{Y}_{\bar{\mathcal{X}}_K}$ .

Give observational distribution  $P(\bar{s}_K, \bar{\mathbf{x}}_K, y) > 0$ , we next construct a family of counterfactual DTRs  $\mathcal{M}_{\text{OBS}}$  that are compatible with the observational distribution, i.e., for any  $M \in \mathcal{M}_{\text{OBS}}$ ,  $P^M(\bar{s}_K, \bar{\mathbf{x}}_K, y) = P(\bar{s}_K, \bar{\mathbf{x}}_K, y)$ . First, any  $M \in \mathcal{M}_{\text{OBS}}$ , its exogenous distribution  $P^M(\bar{\mathcal{X}}_K, \bar{\mathcal{S}}_{K, \bar{\mathcal{X}}_{K-1}}, Y_{\bar{\mathcal{X}}_K})$  must satisfy the following decomposition:

$$\begin{aligned} P^M(\bar{\mathcal{X}}_K, \bar{\mathcal{S}}_{K, \bar{\mathcal{X}}_{K-1}}, Y_{\bar{\mathcal{X}}_K}) &= P^M(s_1) \prod_{\bar{\mathbf{x}}_K^y \in \bar{\mathcal{X}}_K} P^M(Y_{\bar{\mathbf{x}}_K^y} | \bar{\mathcal{S}}_{K, \bar{\mathcal{X}}_{K-1}}, \bar{\mathcal{X}}_K) P^M(\bar{\mathcal{X}}_K | \bar{\mathcal{S}}_{K, \bar{\mathcal{X}}_{K-1}}, \bar{\mathcal{X}}_{K-1}) \\ &\quad \cdot \prod_{k=1}^{K-1} \prod_{\bar{\mathbf{x}}_k^{k+1} \in \bar{\mathcal{X}}_k} P^M(S_{k+1, \bar{\mathbf{x}}_k^{k+1}} | \bar{\mathcal{S}}_{k, \bar{\mathbf{x}}_{k-1}}, \bar{\mathbf{x}}_k) P^M(\bar{\mathcal{X}}_k | \bar{\mathcal{S}}_{k, \bar{\mathbf{x}}_{k-1}}, \bar{\mathcal{X}}_{k-1}). \end{aligned}$$

Among quantities in the above equation, we define factors  $P^M(s_1)$  as the observational probabilities  $P(s_1)$ , i.e.,  $P^M(s_1) = P(s_1)$ . We further define conditional probabilities

$$\begin{aligned} P^M(y_{\bar{\mathbf{x}}_K} | \bar{\mathcal{S}}_{K, \bar{\mathcal{X}}_{K-1}}, \bar{\mathbf{x}}_K) &= P(y | \bar{s}_K, \bar{\mathbf{x}}_K), & P^M(\bar{\mathbf{x}}_K | \bar{\mathcal{S}}_{K, \bar{\mathcal{X}}_{K-1}}, \bar{\mathbf{x}}_{K-1}) &= P(\bar{\mathbf{x}}_K | \bar{s}_K, \bar{\mathbf{x}}_{K-1}), \\ P^M(s_{k+1, \bar{\mathbf{x}}_k} | \bar{\mathcal{S}}_{k, \bar{\mathbf{x}}_{k-1}}, \bar{\mathbf{x}}_k) &= P(s_{k+1} | \bar{s}_k, \bar{\mathbf{x}}_k), & P^M(\bar{\mathbf{x}}_k | \bar{\mathcal{S}}_{k, \bar{\mathbf{x}}_{k-1}}, \bar{\mathbf{x}}_{k-1}) &= P(\bar{\mathbf{x}}_k | \bar{s}_k, \bar{\mathbf{x}}_{k-1}). \end{aligned}$$

112 Other factors can be arbitrary conditional probabilities. It is verifiable that for any  $M \in \mathcal{M}_{\text{OBS}}$ ,  
 113  $P^M(\bar{s}_K, \bar{x}_K, y) = P(\bar{s}_K, \bar{x}_K, y)$ . To witness,

$$\begin{aligned}
 P^M(\bar{s}_K, \bar{x}_K, Y) &= \sum_{k=1}^{K-1} \sum_{\{Y_{\bar{x}_K^y} : \bar{x}_K^y \neq \bar{x}_K\}} \sum_{\{S_{k+1}^{\bar{x}_K^{k+1}} : \bar{x}_K^{k+1} \neq \bar{x}_K\}} P^M(\bar{X}_K, \bar{S}_{K\bar{x}_{K-1}}, Y_{\bar{x}_K}) \\
 &= P^M(s_1) \prod_{\bar{x}_K^y \in \bar{\mathcal{X}}_K} \sum_{\{Y_{\bar{x}_K^y} : \bar{x}_K^y \neq \bar{x}_K\}} P^M(Y_{\bar{x}_K^y} | \bar{S}_{K\bar{x}_{K-1}}, \bar{X}_K) P^M(\bar{X}_K | \bar{S}_{K\bar{x}_{K-1}}, \bar{x}_{K-1}) \\
 &\quad \cdot \prod_{k=1}^{K-1} \prod_{\bar{x}_K^{k+1} \in \bar{\mathcal{X}}_K} \sum_{\{S_{k+1}^{\bar{x}_K^{k+1}} : \bar{x}_K^{k+1} \neq \bar{x}_K\}} P^M(S_{k+1}^{\bar{x}_K^{k+1}} | \bar{S}_{K\bar{x}_{K-1}}, \bar{X}_K) P^M(\bar{X}_K | \bar{S}_{K\bar{x}_{K-1}}, \bar{x}_{K-1}) \\
 &= P^M(s_1) P^M(Y_{\bar{x}_K} | \bar{S}_{K\bar{x}_{K-1}}, \bar{X}_K) P^M(\bar{X}_K | \bar{S}_{K\bar{x}_{K-1}}, \bar{x}_{K-1}) \\
 &\quad \cdot \prod_{k=1}^{K-1} P^M(S_{k+1}^{\bar{x}_K} | \bar{S}_{K\bar{x}_{K-1}}, \bar{x}_k) P^M(\bar{X}_K | \bar{S}_{K\bar{x}_{K-1}}, \bar{x}_{K-1}).
 \end{aligned}$$

114 By definitions of  $\mathcal{M}_{\text{OBS}}$ , we thus have that, for any  $\bar{s}_K, \bar{x}_K, y$ ,

$$\begin{aligned}
 P^M(\bar{s}_K, \bar{x}_K, y) &= P(s_1) P(y | \bar{s}_K, \bar{x}_K) P(\bar{x}_K | \bar{s}_K, \bar{x}_{K-1}) \prod_{k=1}^{K-1} P(s_{k+1} | \bar{s}_k, \bar{x}_k) P(\bar{x}_k | \bar{s}_k, \bar{x}_{k-1}) \\
 &= P(\bar{s}_K, \bar{x}_K, y).
 \end{aligned}$$

115 We will now use the constructions of  $\mathcal{M}_{\text{OBS}}$  to prove the non-identifiability of  $P_{\bar{x}_K}(\bar{s}_K, y)$  in DTRs.

116 **Theorem 4.** Given  $P(\bar{s}_K, \bar{x}_K, y) > 0$ , there exists DTRs  $M_1, M_2$  such that  $P^{M_1}(\bar{s}_K, \bar{x}_K, y) =$   
 117  $P^{M_2}(\bar{s}_K, \bar{x}_K, y) = P(\bar{s}_K, \bar{x}_K, y)$  while  $P_{\bar{x}_K}^{M_1}(\bar{s}_K, y) \neq P_{\bar{x}_K}^{M_2}(\bar{s}_K, y)$ .

118 *Proof.* We define two counterfactual DTRs  $M_1, M_2 \in \mathcal{M}_{\text{OBS}}$  that are compatible with the observa-  
 119 tional distribution  $P(\bar{s}_K, \bar{x}_K, y)$ . If  $K = 1$ , for any  $y, s_1, x_1$  and any  $x_1^y \neq x_1$ , we define

$$P^{M_1}(y_{x_1^y} | s_1, x_1) = 0, \quad P^{M_2}(y_{x_1^y} | s_1, x_1) = 1$$

120 It is verifiable that

$$P_{x_1}^{M_1}(s_1, y) = P(s_1, x_1, y), \quad P_{x_1}^{M_2}(s_1, y) = P(s_1, x_1, y) + (1 - P(x_1 | s_1))P(s_1)$$

121 Since  $P(\bar{s}_K, \bar{x}_K, y) > 0$ , we have  $P_{x_1}^{M_2}(s_1, y) \neq P_{x_1}^{M_1}(s_1, y)$ .

122 We now consider the case where  $K > 1$ . For any  $\bar{x}_K, \bar{s}_K, y$ , and any  $\bar{x}_K^y \neq \bar{x}_K$ , we define

$$P^{M_1}(y_{\bar{x}_K^y} | \bar{s}_{K\bar{x}_{K-1}}, \bar{x}_K) = 0 \tag{32}$$

123 By definitions,  $P_{\bar{x}_K}^{M_1}(\bar{s}_K, y)$  is equal to the counterfactual quantities  $P^{M_1}(\bar{s}_{K\bar{x}_{K-1}}, y_{\bar{x}_K})$ . Thus,

$$\begin{aligned}
 P_{\bar{x}_K}^{M_1}(\bar{s}_K, y) &= P^{M_1}(\bar{s}_{K\bar{x}_{K-1}}, y_{\bar{x}_K}, \bar{x}_K) + \sum_{\bar{x}_K' \neq \bar{x}_K} P^{M_1}(\bar{s}_{K\bar{x}_{K-1}}, y_{\bar{x}_K}, \bar{x}_K') \\
 &= P^{M_1}(\bar{s}_{K\bar{x}_{K-1}}, y_{\bar{x}_K}, \bar{x}_K) + \sum_{\bar{x}_K' \neq \bar{x}_K} P^{M_1}(y_{\bar{x}_K} | \bar{s}_{K\bar{x}_{K-1}}, \bar{x}_K') P^{M_1}(\bar{s}_{K\bar{x}_{K-1}}, \bar{x}_K')
 \end{aligned}$$

124 By the composition axiom,  $\bar{S}_{K\bar{x}_{K-1}} = \bar{S}_K, Y_{\bar{x}_K} = Y$  if  $\bar{X}_K = \bar{x}_K$ . Thus,

125  $P^{M_1}(\bar{s}_{K\bar{x}_{K-1}}, y_{\bar{x}_K}, \bar{x}_K) = P^{M_1}(\bar{s}_K, y, \bar{x}_K)$ . Since  $M_1 \in \mathcal{M}_{\text{OBS}}$ ,  $P^{M_1}(\bar{s}_K, y, \bar{x}_K) =$   
 126  $P(\bar{s}_K, y, \bar{x}_K)$ . Together with Eq. (32), we can obtain

$$P_{\bar{x}_K}^{M_1}(\bar{s}_K, y) = P(\bar{s}_K, \bar{x}_K, y).$$

127 As for  $M_2$ , for any  $\bar{x}_{K-1}^K \neq \bar{x}_{K-1}$ , we define its factor

$$P^{M_2}(s_{K\bar{x}_{K-1}^K} | \bar{s}_{K-1\bar{x}_{K-2}}, \bar{x}_{K-1}) = 0$$

128 The above equation implies that for any  $\bar{x}'_{K-1} \neq \bar{x}_{K-1}$ ,

$$\begin{aligned} & P^{M_2}(\bar{s}_{K\bar{x}_{K-1}}, y_{\bar{x}_K}, \bar{x}'_{K-1}) \\ &= P^{M_2}(y_{\bar{x}_K} | \bar{s}_{K\bar{x}_{K-1}}, \bar{x}'_{K-1}) P^{M_2}(s_{K\bar{x}_{K-1}} | \bar{s}_{K-1\bar{x}_{K-2}}, \bar{x}'_{K-1}) P^{M_2}(\bar{s}_{K-1\bar{x}_{K-2}}, \bar{x}'_{K-1}) \\ &= 0 \end{aligned} \quad (33)$$

129 For any  $\bar{x}_K^y \neq \bar{x}_K$ , we define

$$P^{M_2}(y_{\bar{x}_K} | \bar{s}_{K\bar{x}_{K-1}}, \bar{x}_K) = 1 \quad (34)$$

130 We will now show that the above equation implies that for any  $x'_K \neq x_K$ ,

$$P^{M_2}(\bar{s}_{K\bar{x}_{K-1}}, y_{\bar{x}_K}, x'_K, \bar{x}_{K-1}) = P(\bar{s}_K, \bar{x}_{K-1}). \quad (35)$$

131 We first write  $P^{M_2}(\bar{s}_{K\bar{x}_{K-1}}, y_{\bar{x}_K}, x'_K, \bar{x}_{K-1})$  as:

$$P^{M_2}(\bar{s}_{K\bar{x}_{K-1}}, y_{\bar{x}_K}, x'_K, \bar{x}_{K-1}) = P^{M_2}(y_{\bar{x}_K} | \bar{s}_{K\bar{x}_{K-1}}, x'_K, \bar{x}_{K-1}) P^{M_2}(\bar{s}_{K\bar{x}_{K-1}}, x'_K, \bar{x}_{K-1})$$

132 It is immediate from Eq. (34) that

$$P^{M_2}(\bar{s}_{K\bar{x}_{K-1}}, y_{\bar{x}_K}, X_k \neq x_k, \bar{x}_{K-1}) = P^{M_2}(\bar{s}_{K\bar{x}_{K-1}}, \bar{x}_{K-1}).$$

133 By the composition axiom,  $\bar{S}_{K\bar{x}_{K-1}} = \bar{S}_K$  if  $\bar{X}_{K-1} = \bar{x}_{K-1}$ . Since  $M_2 \in \mathcal{M}_{\text{OBS}}$ , we thus have:

$$P^{M_2}(\bar{s}_{K\bar{x}_{K-1}}, y_{\bar{x}_K}, X_k \neq x_k, \bar{x}_{K-1}) = P^{M_2}(\bar{s}_K, \bar{x}_{K-1}) = P(\bar{s}_K, \bar{x}_{K-1}).$$

134 We now turn our attention to the interventional distribution  $P_{\bar{x}_K}^{M_2}(\bar{s}_K, y)$ . By expanding on  $\bar{X}_K$ ,

$$\begin{aligned} P_{\bar{x}_K}^{M_2}(\bar{s}_K, y) &= P^{M_2}(\bar{s}_{K\bar{x}_{K-1}}, y_{\bar{x}_K}, \bar{x}_K) + P^{M_2}(\bar{s}_{K\bar{x}_{K-1}}, y_{\bar{x}_K}, X_k \neq x_k, \bar{x}_{K-1}) \\ &\quad + P^{M_2}(\bar{s}_{K\bar{x}_{K-1}}, y_{\bar{x}_K}, \bar{X}_{K-1} \neq \bar{x}_{K-1}) \end{aligned}$$

135 The above equation, together with Eqs. (33) and (35), gives:

$$P_{\bar{x}_K}^{M_2}(\bar{s}_K, y) = P^{M_2}(\bar{s}_{K\bar{x}_{K-1}}, y_{\bar{x}_K}, \bar{x}_K) + P(\bar{s}_K, \bar{x}_{K-1}).$$

136 Again, by the composition axiom and  $M_2 \in \mathcal{M}_{\text{OBS}}$ ,

$$P_{\bar{x}_K}^{M_2}(\bar{s}_K, y) = P^{M_2}(\bar{s}_K, y, \bar{x}_K) + P(\bar{s}_K, \bar{x}_{K-1}) = P(\bar{s}_K, y, \bar{x}_K) + P(\bar{s}_K, \bar{x}_{K-1}).$$

137 Since  $P(\bar{s}_K, \bar{x}_{K-1}) > 0$ , we have  $P_{\bar{x}_K}^{M_1}(\bar{s}_K, y) \neq P_{\bar{x}_K}^{M_2}(\bar{s}_K, y)$ , which proves the statement.  $\square$

138 **Lemma 1.** For a DTR, given  $P(\bar{s}_K, \bar{x}_K, y)$ , for any  $k = 1, \dots, K-1$ ,

$$P_{\bar{x}_k}(\bar{s}_{k+1}) - P_{\bar{x}_k}(\bar{s}_k) \leq P(\bar{s}_{k+1}, \bar{x}_k) - P(\bar{s}_k, \bar{x}_k).$$

139 *Proof.* Note that  $P_{\bar{x}_k}(\bar{s}_{k+1})$  can be written as the counterfactual quantity  $P(\bar{s}_{k+1\bar{x}_k})$ . For any set of  
140 variables  $\mathbf{V}$ , let  $\neg \mathbf{v}$  denote an event  $\mathbf{V} \neq \mathbf{v}$ .  $P_{\bar{x}_k}(\bar{s}_{k+1})$  could thus be written as:

$$P_{\bar{x}_k}(\bar{s}_{k+1}) = P(\bar{s}_{k+1\bar{x}_k}, \bar{x}_k) + P(\bar{s}_{k+1\bar{x}_k}, \neg x_k, \bar{x}_{k-1}) + P(\bar{s}_{k+1\bar{x}_k}, \neg \bar{x}_{k-1}),$$

141 By the composition axiom,  $\bar{S}_{k+1\bar{x}_k} = \bar{S}_{k+1}$  if  $\bar{X}_k = \bar{x}_k$ . So,

$$\begin{aligned} P_{\bar{x}_k}(\bar{s}_{k+1}) &= P(\bar{s}_{k+1}, \bar{x}_k) + P(\bar{s}_{k+1\bar{x}_k}, \neg x_k, \bar{x}_{k-1}) + P(\bar{s}_{k+1\bar{x}_k}, \neg \bar{x}_{k-1}) \\ &\leq P(\bar{s}_{k+1}, \bar{x}_k) + P(\bar{s}_{k\bar{x}_k}, \neg x_k, \bar{x}_{k-1}) + P(\bar{s}_{k\bar{x}_k}, \neg \bar{x}_{k-1}) \\ &= P(\bar{s}_{k+1}, \bar{x}_k) + P(\bar{s}_{k\bar{x}_k}, \bar{x}_{k-1}) - P(\bar{s}_{k\bar{x}_k}, \bar{x}_k) + P(\bar{s}_{k\bar{x}_k}) - P(\bar{s}_{k\bar{x}_k}, \bar{x}_{k-1}) \\ &= P(\bar{s}_{k\bar{x}_k}) + P(\bar{s}_{k+1}, \bar{x}_k) - P(\bar{s}_{k\bar{x}_k}, \bar{x}_k). \end{aligned}$$

142 Again, by the composition axiom,  $\bar{S}_{k\bar{x}_k} = \bar{S}_k$  if  $\bar{X}_k = \bar{x}_k$ . Since  $P(\bar{s}_{k\bar{x}_k}) = P_{\bar{x}_k}(\bar{s}_k)$ ,

$$P_{\bar{x}_k}(\bar{s}_{k+1}) \leq P_{\bar{x}_k}(\bar{s}_k) + P(\bar{s}_{k+1}, \bar{x}_k) - P(\bar{s}_k, \bar{x}_k)$$

143 Rearranging the above equation proves the statement.  $\square$

144 **Lemma 4.** For a DTR, given  $P(\bar{s}_K, \bar{x}_K, y)$ , for any  $k = 0, \dots, K-1$ ,

$$P_{\bar{x}_k}(\bar{s}_{k+1}) \leq \Gamma(\bar{s}_{k+1}, \bar{x}_k),$$

145 where  $\Gamma(\bar{s}_{k+1}, \bar{x}_k) = P(\bar{s}_{k+1}, \bar{x}_k) - P(\bar{s}_k, \bar{x}_k) + \Gamma(\bar{s}_k, \bar{x}_{k-1})$  and  $\Gamma(s_1) = P(s_1)$ .

146 *Proof.* We prove this statement by induction.



147 **Base Case:**  $k = 0$  By definition,  $\Gamma(s_1) = P(s_1)$ . We thus have  $P(s_1) \leq \Gamma(s_1)$ .

148 **Induction Step** We assume that the statement holds for  $k$ , i.e.,  $P_{\bar{\mathbf{x}}_k}(\bar{\mathbf{s}}_{k+1}) \leq \Gamma(\bar{\mathbf{s}}_{k+1}, \bar{\mathbf{x}}_k)$ . We  
 149 will prove that the statement holds for  $k + 1$ , i.e.,  $P_{\bar{\mathbf{x}}_{k+1}}(\bar{\mathbf{s}}_{k+2}) \leq \Gamma(\bar{\mathbf{s}}_{k+2}, \bar{\mathbf{x}}_{k+1})$ . To begin with,

$$P_{\bar{\mathbf{x}}_{k+1}}(\bar{\mathbf{s}}_{k+2}) = P_{\bar{\mathbf{x}}_{k+1}}(\bar{\mathbf{s}}_{k+2}) - P_{\bar{\mathbf{x}}_{k+1}}(\bar{\mathbf{s}}_{k+1}) + P_{\bar{\mathbf{x}}_{k+1}}(\bar{\mathbf{s}}_{k+1}).$$

150 By Lem. 1,

$$P_{\bar{\mathbf{x}}_{k+1}}(\bar{\mathbf{s}}_{k+2}) \leq P(\bar{\mathbf{s}}_{k+2}, \bar{\mathbf{x}}_{k+1}) - P(\bar{\mathbf{s}}_{k+1}, \bar{\mathbf{x}}_{k+1}) + P_{\bar{\mathbf{x}}_{k+1}}(\bar{\mathbf{s}}_{k+1}).$$

151 Since  $\bar{\mathbf{S}}_{k+1}$  are non-descendants of  $X_{k+1}$ ,  $P_{\bar{\mathbf{x}}_{k+1}}(\bar{\mathbf{s}}_{k+1}) = P_{\bar{\mathbf{x}}_k}(\bar{\mathbf{s}}_{k+1})$ . Since  $P_{\bar{\mathbf{x}}_k}(\bar{\mathbf{s}}_{k+1}) \leq$   
 152  $\Gamma(\bar{\mathbf{s}}_{k+1}, \bar{\mathbf{x}}_k)$ ,

$$P_{\bar{\mathbf{x}}_{k+1}}(\bar{\mathbf{s}}_{k+2}) \leq P(\bar{\mathbf{s}}_{k+2}, \bar{\mathbf{x}}_{k+1}) - P(\bar{\mathbf{s}}_{k+1}, \bar{\mathbf{x}}_{k+1}) + \Gamma(\bar{\mathbf{s}}_{k+1}, \bar{\mathbf{x}}_k) = \Gamma(\bar{\mathbf{s}}_{k+2}, \bar{\mathbf{x}}_{k+1}). \quad \square$$

153 **Theorem 5.** For a DTR, given  $P(\bar{\mathbf{s}}_K, \bar{\mathbf{x}}_K, y) > 0$ , for any  $k = 1, \dots, K - 1$ ,

$$\frac{P(\bar{\mathbf{s}}_{k+1}, \bar{\mathbf{x}}_k)}{\Gamma(\bar{\mathbf{s}}_k, \bar{\mathbf{x}}_{k-1})} \leq P_{\bar{\mathbf{x}}_k}(s_{k+1}|\bar{\mathbf{s}}_k) \leq \frac{\Gamma(\bar{\mathbf{s}}_{k+1}, \bar{\mathbf{x}}_k)}{\Gamma(\bar{\mathbf{s}}_k, \bar{\mathbf{x}}_{k-1})},$$

154 *Proof.* By basic probabilistic operations,

$$P_{\bar{\mathbf{x}}_k}(s_{k+1}|\bar{\mathbf{s}}_k) = \frac{P_{\bar{\mathbf{x}}_k}(\bar{\mathbf{s}}_{k+1})}{P_{\bar{\mathbf{x}}_k}(\bar{\mathbf{s}}_k)}.$$

155 By Lem. 1,

$$P_{\bar{\mathbf{x}}_k}(s_{k+1}|\bar{\mathbf{s}}_k) \leq 1 + \frac{P(\bar{\mathbf{s}}_{k+1}, \bar{\mathbf{x}}_k) - P(\bar{\mathbf{s}}_k, \bar{\mathbf{x}}_k)}{P_{\bar{\mathbf{x}}_k}(\bar{\mathbf{s}}_k)}.$$

156 Since  $P(\bar{\mathbf{s}}_{k+1}, \bar{\mathbf{x}}_k) \leq P(\bar{\mathbf{s}}_k, \bar{\mathbf{x}}_k)$ ,  $P_{\bar{\mathbf{x}}_k}(s_{k+1}|\bar{\mathbf{s}}_k)$  is upper-bounded when  $P_{\bar{\mathbf{x}}_k}(\bar{\mathbf{s}}_k)$  is the maximal.  
 157 Since  $\bar{\mathbf{S}}_k$  are non-descendants of  $X_k$ ,  $P_{\bar{\mathbf{x}}_k}(\bar{\mathbf{s}}_k) = P_{\bar{\mathbf{x}}_{k-1}}(\bar{\mathbf{s}}_k)$ . Together with Lem. 4, the above  
 158 equation can be further bounded as:

$$P_{\bar{\mathbf{x}}_k}(s_{k+1}|\bar{\mathbf{s}}_k) \leq 1 + \frac{P(\bar{\mathbf{s}}_{k+1}, \bar{\mathbf{x}}_k) - P(\bar{\mathbf{s}}_k, \bar{\mathbf{x}}_k)}{\Gamma(\bar{\mathbf{s}}_k, \bar{\mathbf{x}}_{k-1})} = \frac{\Gamma(\bar{\mathbf{s}}_{k+1}, \bar{\mathbf{x}}_k)}{\Gamma(\bar{\mathbf{s}}_k, \bar{\mathbf{x}}_{k-1})}.$$

159 By definition,  $P_{\bar{\mathbf{x}}_k}(\bar{\mathbf{s}}_{k+1}) = P(\bar{\mathbf{s}}_{k+1}, \bar{\mathbf{x}}_k)$ . By basic probabilistic operations,

$$P_{\bar{\mathbf{x}}_k}(s_{k+1}|\bar{\mathbf{s}}_k) = \frac{P(\bar{\mathbf{s}}_{k+1}, \bar{\mathbf{x}}_k) + P(\bar{\mathbf{s}}_{k+1}, \neg\bar{\mathbf{x}}_k)}{P_{\bar{\mathbf{x}}_k}(\bar{\mathbf{s}}_k)} \geq \frac{P(\bar{\mathbf{s}}_{k+1}, \bar{\mathbf{x}}_k)}{P_{\bar{\mathbf{x}}_k}(\bar{\mathbf{s}}_k)}.$$

160 By the composition axiom,  $\bar{\mathbf{S}}_{k+1, \bar{\mathbf{x}}_k} = \bar{\mathbf{S}}_{k+1}$  if  $\bar{\mathbf{X}}_k = \bar{\mathbf{x}}_k$ . Applying Lem. 4 again gives

$$P_{\bar{\mathbf{x}}_k}(s_{k+1}|\bar{\mathbf{s}}_k) \geq \frac{P(\bar{\mathbf{s}}_{k+1}, \bar{\mathbf{x}}_k)}{P_{\bar{\mathbf{x}}_k}(\bar{\mathbf{s}}_k)} = \frac{P(\bar{\mathbf{s}}_{k+1}, \bar{\mathbf{x}}_k)}{\Gamma(\bar{\mathbf{s}}_k, \bar{\mathbf{x}}_{k-1})}. \quad \square$$

161 **Theorem 6.** Given  $P(\bar{\mathbf{s}}_K, \bar{\mathbf{x}}_K, y) > 0$ , for any  $k \in \{1, \dots, K - 1\}$ , let  $P_{\bar{\mathbf{x}}_k}(s_{k+1}|\bar{\mathbf{s}}_k) \in$   
 162  $[a_{\bar{\mathbf{x}}_k, \bar{\mathbf{s}}_k}(s_{k+1}), b_{\bar{\mathbf{x}}_k, \bar{\mathbf{s}}_k}(s_{k+1})]$  denote the bound given by Thm. 5. There exists DTRs  $M_1, M_2$  such  
 163 that  $P^{M_1}(\bar{\mathbf{s}}_K, \bar{\mathbf{x}}_K, y) = P^{M_2}(\bar{\mathbf{s}}_K, \bar{\mathbf{x}}_K, y) = P(\bar{\mathbf{s}}_K, \bar{\mathbf{x}}_K, y)$  while  $P_{\bar{\mathbf{x}}_k}^{M_1}(s_{k+1}|\bar{\mathbf{s}}_k) = a_{\bar{\mathbf{x}}_k, \bar{\mathbf{s}}_k}(s_{k+1})$ ,  
 164  $P_{\bar{\mathbf{x}}_k}^{M_2}(s_{k+1}|\bar{\mathbf{s}}_k) = b_{\bar{\mathbf{x}}_k, \bar{\mathbf{s}}_k}(s_{k+1})$ .

165 *Proof.* Without loss of generality, we assume that  $K > 1$ . We consider two counterfactual DTRs  
 166  $M_1, M_2 \in \mathcal{M}_{\text{OBS}}$  compatible with the observational distribution  $P(\bar{\mathbf{s}}_K, \bar{\mathbf{x}}_K, y)$ , which we define at  
 167 the beginning of this section. For all  $i = 1, \dots, k - 1$ , for any  $\bar{\mathbf{x}}_i^{i+1} \neq \bar{\mathbf{x}}_i$ , we define that for any  
 168  $M \in \{M_1, M_2\}$ , its factors satisfy:

$$P^M(s_{i+1, \bar{\mathbf{x}}_i^{i+1}}|\bar{\mathbf{s}}_{i, \bar{\mathbf{x}}_{i-1}}, \bar{\mathbf{x}}_i) = 1. \quad (36)$$

169 Following a similar argument in Lem. 1, we will show that for any  $M \in \{M_1, M_2\}$ , for any  
 170  $i = 1, \dots, k - 1$ ,

$$P_{\bar{\mathbf{x}}_i}^M(\bar{\mathbf{s}}_{i+1}) - P_{\bar{\mathbf{x}}_i}^M(\bar{\mathbf{s}}_i) = P(\bar{\mathbf{s}}_{i+1}, \bar{\mathbf{x}}_i) - P(\bar{\mathbf{s}}_i, \bar{\mathbf{x}}_i). \quad (37)$$

171 By  $P_{\bar{\mathbf{x}}_i}^M(\bar{\mathbf{s}}_{i+1}) = P^M(\bar{\mathbf{s}}_{i+1, \bar{\mathbf{x}}_i})$  and basic probabilistic operations,

$$P_{\bar{\mathbf{x}}_i}^M(\bar{\mathbf{s}}_{i+1}) = P^M(\bar{\mathbf{s}}_{i+1, \bar{\mathbf{x}}_i}, \bar{\mathbf{x}}_i) + P^M(\bar{\mathbf{s}}_{i+1, \bar{\mathbf{x}}_i}, X_i \neq x_i, \bar{\mathbf{x}}_{i-1}) + P^M(\bar{\mathbf{s}}_{i+1, \bar{\mathbf{x}}_i}, \bar{X}_{i-1} \neq \bar{\mathbf{x}}_{i-1}).$$

172 By the composition axiom,  $\bar{\mathbf{S}}_{i+1, \bar{\mathbf{x}}_i} = \bar{\mathbf{S}}_{i+1}$  if  $\bar{X}_i = \bar{\mathbf{x}}_i$ . Since  $M \in \mathcal{M}_{\text{OBS}}$ ,  $P^M(\bar{\mathbf{s}}_{i+1}, \bar{\mathbf{x}}_i) =$   
 173  $P(\bar{\mathbf{s}}_{i+1}, \bar{\mathbf{x}}_i)$ . Therefore,

$$\begin{aligned} P_{\bar{\mathbf{x}}_i}^M(\bar{\mathbf{s}}_{i+1}) &= P(\bar{\mathbf{s}}_{i+1}, \bar{\mathbf{x}}_i) + P^M(\bar{\mathbf{s}}_{i+1, \bar{\mathbf{x}}_i}, X_i \neq x_i, \bar{\mathbf{x}}_{i-1}) + P^M(\bar{\mathbf{s}}_{i+1, \bar{\mathbf{x}}_i}, \bar{X}_{i-1} \neq \bar{\mathbf{x}}_{i-1}), \\ &= P(\bar{\mathbf{s}}_{i+1}, \bar{\mathbf{x}}_i) + \sum_{x'_i \neq x_i} P^M(s_{i+1, \bar{\mathbf{x}}_i} | \bar{\mathbf{s}}_{i, \bar{\mathbf{x}}_{i-1}}, x'_i, \bar{\mathbf{x}}_{i-1}) P(\bar{\mathbf{s}}_{i, \bar{\mathbf{x}}_{i-1}}, x'_i, \bar{\mathbf{x}}_{i-1}) \\ &\quad + \sum_{\bar{\mathbf{x}}'_{i-1} \neq \bar{\mathbf{x}}_{i-1}} P^M(s_{i+1, \bar{\mathbf{x}}_i} | \bar{\mathbf{s}}_{i, \bar{\mathbf{x}}_{i-1}}, x_i, \bar{\mathbf{x}}'_{i-1}) P(\bar{\mathbf{s}}_{i, \bar{\mathbf{x}}_{i-1}}, x_i, \bar{\mathbf{x}}'_{i-1}) \end{aligned}$$

174 By Eq. (36),  $P^M(s_{i+1, \bar{\mathbf{x}}_i} | \bar{\mathbf{s}}_{i, \bar{\mathbf{x}}_{i-1}}, x'_i, \bar{\mathbf{x}}_{i-1}) = P^M(s_{i+1, \bar{\mathbf{x}}_i} | \bar{\mathbf{s}}_{i, \bar{\mathbf{x}}_{i-1}}, x_i, \bar{\mathbf{x}}'_{i-1}) = 1$ , which gives

$$\begin{aligned} P_{\bar{\mathbf{x}}_i}^M(\bar{\mathbf{s}}_{i+1}) &= P(\bar{\mathbf{s}}_{i+1}, \bar{\mathbf{x}}_i) + P^M(\bar{\mathbf{s}}_{i, \bar{\mathbf{x}}_i}, X_i \neq x_i, \bar{\mathbf{x}}_{i-1}) + P^M(\bar{\mathbf{s}}_{i, \bar{\mathbf{x}}_i}, \bar{X}_{i-1} \neq \bar{\mathbf{x}}_{i-1}) \\ &= P(\bar{\mathbf{s}}_{i+1}, \bar{\mathbf{x}}_i) + P^M(\bar{\mathbf{s}}_{i, \bar{\mathbf{x}}_i}, \bar{\mathbf{x}}_{i-1}) - P^M(\bar{\mathbf{s}}_{i, \bar{\mathbf{x}}_i}, \bar{\mathbf{x}}_i) + P^M(\bar{\mathbf{s}}_{i, \bar{\mathbf{x}}_i}) - P^M(\bar{\mathbf{s}}_{i, \bar{\mathbf{x}}_i}, \bar{\mathbf{x}}_{i-1}) \\ &= P^M(\bar{\mathbf{s}}_{i, \bar{\mathbf{x}}_i}) + P(\bar{\mathbf{s}}_{i+1}, \bar{\mathbf{x}}_i) - P^M(\bar{\mathbf{s}}_{i, \bar{\mathbf{x}}_i}, \bar{\mathbf{x}}_i) \end{aligned}$$

175 Again, by the composition axiom and  $M \in \mathcal{M}_{\text{OBS}}$ ,  $P^M(\bar{\mathbf{s}}_{i, \bar{\mathbf{x}}_i}, \bar{\mathbf{x}}_i) = P(\bar{\mathbf{s}}_i, \bar{\mathbf{x}}_i)$ . Since  $P^M(\bar{\mathbf{s}}_{i, \bar{\mathbf{x}}_i}) =$   
 176  $P_{\bar{\mathbf{x}}_i}^M(\bar{\mathbf{s}}_i)$ , we have

$$P_{\bar{\mathbf{x}}_i}^M(\bar{\mathbf{s}}_{i+1}) = P_{\bar{\mathbf{x}}_i}^M(\bar{\mathbf{s}}_i) + P(\bar{\mathbf{s}}_{i+1}, \bar{\mathbf{x}}_i) - P(\bar{\mathbf{s}}_i, \bar{\mathbf{x}}_i).$$

177 Rearranging the above equation proves Eq. (36). Following a similar induction procedure in the proof  
 178 of Lem. 4, we have that for any  $M \in \{M_1, M_2\}$ ,

$$P_{\bar{\mathbf{x}}_{k-1}}^M(\bar{\mathbf{s}}_k) = \Gamma(\bar{\mathbf{s}}_k, \bar{\mathbf{x}}_{k-1}). \quad (38)$$

179 As for  $M_1$ , for any  $\bar{\mathbf{x}}_k^{k+1} \neq \bar{\mathbf{x}}_k$ , we define

$$P^{M_1}(s_{k+1, \bar{\mathbf{x}}_k^{k+1}} | \bar{\mathbf{s}}_{k, \bar{\mathbf{x}}_{k-1}}, \bar{\mathbf{x}}_k) = 0$$

180 This implies

$$\begin{aligned} P_{\bar{\mathbf{x}}_k}^{M_1}(\bar{\mathbf{s}}_{k+1}) &= P^{M_1}(\bar{\mathbf{s}}_{k+1, \bar{\mathbf{x}}_k}, \bar{\mathbf{x}}_k) + \sum_{\bar{\mathbf{x}}'_k \neq \bar{\mathbf{x}}_k} P^{M_1}(s_{k+1, \bar{\mathbf{x}}_k} | \bar{\mathbf{s}}_{k, \bar{\mathbf{x}}_{k-1}}, \bar{\mathbf{x}}'_k) P^{M_1}(\bar{\mathbf{s}}_{k, \bar{\mathbf{x}}_{k-1}}, \bar{\mathbf{x}}'_k) \\ &= P^{M_1}(\bar{\mathbf{s}}_{k+1, \bar{\mathbf{x}}_k}, \bar{\mathbf{x}}_k). \end{aligned}$$

181 By the composition axiom and  $M_1 \in \mathcal{M}_{\text{OBS}}$ ,  $P^{M_1}(\bar{\mathbf{s}}_{k+1, \bar{\mathbf{x}}_k}, \bar{\mathbf{x}}_k) = P(\bar{\mathbf{s}}_{k+1}, \bar{\mathbf{x}}_k)$ , which gives

$$P_{\bar{\mathbf{x}}_k}^{M_1}(\bar{\mathbf{s}}_{k+1}) = P(\bar{\mathbf{s}}_{k+1}, \bar{\mathbf{x}}_k).$$

182 The above equation, together with Eq. (38), gives:

$$P_{\bar{\mathbf{x}}_k}^{M_1}(s_{k+1} | \bar{\mathbf{s}}_k) = \frac{P_{\bar{\mathbf{x}}_k}^{M_1}(\bar{\mathbf{s}}_{k+1})}{P_{\bar{\mathbf{x}}_{k-1}}^M(\bar{\mathbf{s}}_k)} = \frac{P(\bar{\mathbf{s}}_{k+1}, \bar{\mathbf{x}}_k)}{\Gamma(\bar{\mathbf{s}}_k, \bar{\mathbf{x}}_{k-1})} = a_{\bar{\mathbf{x}}_k, \bar{\mathbf{s}}_k}(s_{k+1}).$$

183 As for  $M_2$ , for any  $\bar{\mathbf{x}}_k^{k+1} \neq \bar{\mathbf{x}}_k$ , we define

$$P^{M_2}(s_{k+1, \bar{\mathbf{x}}_k^{k+1}} | \bar{\mathbf{s}}_{k, \bar{\mathbf{x}}_{k-1}}, \bar{\mathbf{x}}_k) = 1.$$

184 Following a similar procedure for proving Eq. (38), we have

$$P_{\bar{\mathbf{x}}_k}^M(\bar{\mathbf{s}}_{k+1}) = \Gamma(\bar{\mathbf{s}}_{k+1}, \bar{\mathbf{x}}_k).$$

185 Thus,

$$P_{\bar{\mathbf{x}}_k}^{M_2}(s_{k+1} | \bar{\mathbf{s}}_k) = \frac{P_{\bar{\mathbf{x}}_k}^{M_2}(\bar{\mathbf{s}}_{k+1})}{P_{\bar{\mathbf{x}}_{k-1}}^{M_2}(\bar{\mathbf{s}}_k)} = \frac{\Gamma(\bar{\mathbf{s}}_{k+1}, \bar{\mathbf{x}}_k)}{\Gamma(\bar{\mathbf{s}}_k, \bar{\mathbf{x}}_{k-1})} = b_{\bar{\mathbf{x}}_k, \bar{\mathbf{s}}_k}(s_{k+1}). \quad \square$$

186 **Corollary 2.** For a DTR, given  $P(\bar{s}_K, \bar{x}_K, y) > 0$ ,

$$\frac{E[Y|\bar{s}_K, \bar{x}_K]P(\bar{s}_K, \bar{x}_K)}{\Gamma(\bar{s}_K, \bar{x}_{K-1})} \leq E_{\bar{x}_K}[Y|\bar{s}_k] \leq 1 + \frac{(E[Y|\bar{s}_K, \bar{x}_K] - 1)P(\bar{s}_K, \bar{x}_K)}{\Gamma(\bar{s}_K, \bar{x}_{K-1})}.$$

187 *Proof.* By basic probabilistic operations,

$$E_{\bar{x}_K}[Y|\bar{s}_k] = \frac{E_{\bar{x}_K}[Y|\bar{s}_K]P_{\bar{x}_K}(\bar{s}_K)}{P_{\bar{x}_K}(\bar{s}_K)}.$$

188 Note the counterfactual  $Y_{\bar{x}_K, \bar{s}_K}(\mathbf{u}) \in [0, 1]$ . Following a similar argument as Lem. 1,

$$E_{\bar{x}_K}[Y|\bar{s}_K]P_{\bar{x}_K}(\bar{s}_K) - P_{\bar{x}_K}(\bar{s}_K) \leq E[Y|\bar{s}_K, \bar{x}_K]P(\bar{s}_K, \bar{x}_K) - P(\bar{s}_K, \bar{x}_K).$$

189 This implies

$$E_{\bar{x}_K}[Y|\bar{s}_k] \leq 1 + \frac{(E[Y|\bar{s}_K, \bar{x}_K] - 1)P(\bar{s}_K, \bar{x}_K)}{P_{\bar{x}_K}(\bar{s}_K)}.$$

190 Since  $E[Y|\bar{s}_K, \bar{x}_K] \leq 1$ ,  $E_{\bar{x}_K}[Y|\bar{s}_k]$  is upper-bounded when  $P_{\bar{x}_K}(\bar{s}_K)$  is the maximal. Since  $\bar{S}_K$   
191 are non-descendants of  $X_K$ ,  $P_{\bar{x}_K}(\bar{s}_K) = P_{\bar{x}_{K-1}}(\bar{s}_K)$ . By Lem. 4,

$$E_{\bar{x}_K}[Y|\bar{s}_k] \leq 1 + \frac{(E[Y|\bar{s}_K, \bar{x}_K] - 1)P(\bar{s}_K, \bar{x}_K)}{\Gamma(\bar{s}_k, \bar{x}_{k-1})}.$$

192 By definition,  $P_{\bar{x}_K}(y, \bar{s}_K) = P(y_{\bar{x}_K}, \bar{s}_{K\bar{x}_{K-1}})$ . By basic probabilistic operations,

$$E_{\bar{x}_K}[Y|\bar{s}_k] \geq \frac{E[Y_{\bar{x}_K}|\bar{s}_{K\bar{x}_{K-1}}, \bar{x}_K]P(\bar{s}_{K\bar{x}_{K-1}}, \bar{x}_K)}{P_{\bar{x}_{K-1}}(\bar{s}_K)}.$$

193 By the composition axiom,  $\bar{S}_{K\bar{x}_{K-1}} = \bar{S}_{K-1}$ ,  $Y_{\bar{x}_K} = Y$  if  $\bar{X}_K = \bar{x}_K$ . Applying Lem. 4 gives

$$E_{\bar{x}_K}[Y|\bar{s}_k] \geq \frac{E[Y|\bar{s}_K, \bar{x}_K]P(\bar{s}_K, \bar{x}_K)}{P_{\bar{x}_K}(\bar{s}_K)} = \frac{E[Y|\bar{s}_K, \bar{x}_K]P(\bar{s}_K, \bar{x}_K)}{\Gamma(\bar{s}_K, \bar{x}_{K-1})}. \quad \square$$

#### 194 **Proof of Theorems 7 and 8**

195 **Lemma 5.** Fix  $\epsilon > 0$ ,  $\delta \in (0, 1)$ . With probability (w.p.) of at least  $1 - \delta$ , it holds for any  $T > 1$ ,  
196  $R_\epsilon(T)$  of UC-DTR with parameter  $\delta$  and causal bounds  $\mathcal{C}$  is bounded by

$$R_\epsilon(T) \leq \min \left\{ 12K\sqrt{|\mathcal{S}||\mathcal{X}|T_\epsilon \log(2K|\mathcal{S}||\mathcal{X}|T/\delta)}, \|\mathcal{C}\|_1 T_\epsilon \right\} + 4K\sqrt{T_\epsilon \log(2T/\delta)}$$

197 *Proof.* Note that causal bounds  $\mathcal{C}$  is a set  $\{\mathcal{C}_1, \dots, \mathcal{C}_K\}$  where for  $k = 1, \dots, K-1$ ,

$$\mathcal{C}_k = \left\{ \forall \bar{s}_{k+1}, \bar{x}_k : [a_{\bar{x}_k, \bar{s}_k}(s_{k+1}), b_{\bar{x}_k, \bar{s}_k}(s_{k+1})] \right\}, \quad (39)$$

$$\text{and } \mathcal{C}_K = \left\{ \forall \bar{s}_K, \bar{x}_K : [a_{\bar{x}_K, \bar{s}_K}, b_{\bar{x}_K, \bar{s}_K}] \right\}.$$

198  $\mathcal{M}^c$  is a set of DTRs such that for any  $M \in \mathcal{M}^c$ , its causal quantities  $P_{\bar{x}_k}(s_{k+1}|\bar{s}_k)$  and  $E_{\bar{x}_K}[Y|\bar{s}_K]$   
199 satisfy the causal bounds  $\mathcal{C}$ , i.e.,

$$P_{\bar{x}_k}(s_{k+1}|\bar{s}_k) \in [a_{\bar{x}_k, \bar{s}_k}(s_{k+1}), b_{\bar{x}_k, \bar{s}_k}(s_{k+1})], \quad \text{and } E_{\bar{x}_K}[Y|\bar{s}_K] \in [a_{\bar{x}_K, \bar{s}_K}, b_{\bar{x}_K, \bar{s}_K}]. \quad (40)$$

200 Let  $\mathcal{M}_t^c = \mathcal{M}_t \cap \mathcal{M}^c$ . Since  $\mathcal{M}_t^c \subseteq \mathcal{M}_t$ , following a similar argument in [4, C.1], we have

$$P(M^* \in \mathcal{M}_t^c) \leq P(M^* \in \mathcal{M}_t) \leq \frac{\delta}{4t^2}. \quad (41)$$

201 Since  $\sum_{t=1}^{\infty} \frac{1}{4t^2} \leq \frac{\pi^2}{24}\delta < \frac{\delta}{2}$ , it follows that with probability at least  $1 - \frac{\delta}{2}$ ,  $M^* \in \mathcal{M}_c^t$  for all  
202 episodes  $t = 1, 2, \dots$ .

203 Following the proof of Lem. 3, we have

$$R_\epsilon(T) \leq K\sqrt{6T_\epsilon \log(2T/\delta)} + \sqrt{\frac{3T_\epsilon \log(2T/\delta)}{2}} \\ + \sum_{k=1}^{K-1} \sum_{t \in L_\epsilon} V_{\pi_t}(\bar{S}_k^t, \bar{X}_k^t; M_t^{(k)}) - V_{\pi_t}(\bar{S}_k^t, \bar{X}_k^t; M_t^{(k+1)}) \quad (42)$$

$$+ \sum_{t \in L_\epsilon} (E_{\bar{X}_K^t}^{M_t}[Y|\bar{S}_K^t] - E_{\bar{X}_K^t}[Y|\bar{S}_K^t]). \quad (43)$$

204 It thus suffices to bound quantities in Eqs. (42) and (43) separately.

205 **Bounding Eq. (42)** By Eq. (22) and basic probabilistic operations,

$$\begin{aligned}
& V_{\pi_t}(\bar{\mathbf{S}}_k^t, \bar{\mathbf{X}}_k^t; M_t^{(k)}) - V_{\pi_t}(\bar{\mathbf{S}}_k^t, \bar{\mathbf{X}}_k^t; M_t^{(k+1)}) \\
&= \sum_{s_{k+1}} (P^{M_t}(s_{k+1} | \bar{\mathbf{S}}_k, \bar{\mathbf{X}}_k) - P(s_{k+1} | \bar{\mathbf{S}}_k, \bar{\mathbf{X}}_k)) V_{\pi_t}(s_{k+1}, \bar{\mathbf{S}}_k^t, \bar{\mathbf{X}}_k^t; M_t) \\
&\leq \left\| P_{\bar{\mathbf{a}}_k}^{M_t}(\cdot | \bar{\mathbf{s}}_k) - P_{\bar{\mathbf{a}}_k}(\cdot | \bar{\mathbf{s}}_k) \right\|_1 \max_{s_{k+1}} V_{\pi_t}(s_{k+1}, \bar{\mathbf{S}}_k^t, \bar{\mathbf{X}}_k^t; M_t) \\
&\leq \min \left\{ 2\sqrt{6|\mathcal{S}_{k+1}| \log(2K|\bar{\mathbf{S}}_k||\bar{\mathbf{X}}_k|T/\delta)} \frac{1}{\sqrt{\max\{1, N^t(\bar{\mathbf{S}}_k^t, \bar{\mathbf{X}}_k^t)\}}}, \|\mathbf{c}_k\|_1 \right\}
\end{aligned}$$

206 The last step follows from Eqs. (16) and (40). We thus have

$$\begin{aligned}
& \sum_{t \in L_\epsilon} V_{\pi_t}(\bar{\mathbf{S}}_k^t, \bar{\mathbf{X}}_k^t; M_t^{(k)}) - V_{\pi_t}(\bar{\mathbf{S}}_k^t, \bar{\mathbf{X}}_k^t; M_t^{(k+1)}) \\
&\leq \sum_{t \in L_\epsilon} \min \left\{ 2\sqrt{6|\mathcal{S}_{k+1}| \log(2K|\bar{\mathbf{S}}_k||\bar{\mathbf{X}}_k|T/\delta)} \frac{1}{\sqrt{\max\{1, N^t(\bar{\mathbf{S}}_k^t, \bar{\mathbf{X}}_k^t)\}}}, \|\mathbf{c}_k\|_1 \right\} \\
&\leq \min \left\{ \sum_{t \in L_\epsilon} 2\sqrt{6|\mathcal{S}_{k+1}| \log(2K|\bar{\mathbf{S}}_k||\bar{\mathbf{X}}_k|T/\delta)} \frac{1}{\sqrt{\max\{1, N^t(\bar{\mathbf{S}}_k^t, \bar{\mathbf{X}}_k^t)\}}}, \sum_{t \in L_\epsilon} \|\mathbf{c}_k\|_1 \right\} \\
&\leq \min \left\{ 2(\sqrt{2} + 1)\sqrt{6T_\epsilon|\bar{\mathbf{S}}_{k+1}||\bar{\mathbf{X}}_k| \log(2K|\bar{\mathbf{S}}_k||\bar{\mathbf{X}}_k|T/\delta)}, \|\mathbf{c}_k\|_1 T_\epsilon \right\}
\end{aligned}$$

207 The last step follows from results in [4, D] and  $|L_\epsilon| = T_\epsilon$ . Eq. (42) could thus be written as:

$$\begin{aligned}
& \sum_{k=1}^{K-1} \sum_{t \in L_\epsilon} V_{\pi_t}(\bar{\mathbf{S}}_k^t, \bar{\mathbf{X}}_k^t; M_t^{(k)}) - V_{\pi_t}(\bar{\mathbf{S}}_k^t, \bar{\mathbf{X}}_k^t; M_t^{(k+1)}) \\
&\leq \sum_{k=1}^{K-1} \min \left\{ 2(\sqrt{2} + 1)\sqrt{6T_\epsilon|\bar{\mathbf{S}}_{k+1}||\bar{\mathbf{X}}_k| \log(2K|\bar{\mathbf{S}}_k||\bar{\mathbf{X}}_k|T/\delta)}, \|\mathbf{c}_k\|_1 T_\epsilon \right\} \\
&\leq \min \left\{ \sum_{k=1}^{K-1} 2(\sqrt{2} + 1)\sqrt{6T_\epsilon|\bar{\mathbf{S}}_{k+1}||\bar{\mathbf{X}}_k| \log(2K|\bar{\mathbf{S}}_k||\bar{\mathbf{X}}_k|T/\delta)}, \sum_{k=1}^{K-1} \|\mathbf{c}_k\|_1 T_\epsilon \right\}
\end{aligned}$$

208 Thus,

$$\begin{aligned}
& \sum_{k=1}^{K-1} \sum_{t \in L_\epsilon} V_{\pi_t}(\bar{\mathbf{S}}_k^t, \bar{\mathbf{X}}_k^t; M_t^{(k)}) - V_{\pi_t}(\bar{\mathbf{S}}_k^t, \bar{\mathbf{X}}_k^t; M_t^{(k+1)}) \\
&\leq \min \left\{ (K-1)2(\sqrt{2} + 1)\sqrt{6T_\epsilon|\bar{\mathbf{S}}||\bar{\mathbf{X}}| \log(2K|\bar{\mathbf{S}}||\bar{\mathbf{X}}|T/\delta)}, \sum_{k=1}^{K-1} \|\mathbf{c}_k\|_1 T_\epsilon \right\}.
\end{aligned} \tag{44}$$

209 **Bounding Eq. (43)** Since both  $M^*, M_t$  are in the set  $\mathcal{M}_t^c$ ,

$$\begin{aligned}
& E_{\bar{\mathbf{X}}_K^t}^{M_t}[Y | \bar{\mathbf{S}}_K^t] - E_{\bar{\mathbf{X}}_K^t}[Y | \bar{\mathbf{S}}_K^t] \leq \left| E_{\bar{\mathbf{a}}_K}^{M_t}[Y | \bar{\mathbf{s}}_K] - \hat{E}_{\bar{\mathbf{a}}_K}^t[Y | \bar{\mathbf{s}}_K] \right| + \left| E_{\bar{\mathbf{X}}_K^t}[Y | \bar{\mathbf{S}}_K^t] - \hat{E}_{\bar{\mathbf{a}}_K}^t[Y | \bar{\mathbf{s}}_K] \right| \\
&\leq \min \left\{ 2\sqrt{2 \log(2K|\mathcal{S}||\mathcal{X}|T/\delta)} \frac{1}{\sqrt{\max\{1, N^t(\bar{\mathbf{S}}_K^t, \bar{\mathbf{X}}_K^t)\}}}, \|\mathbf{c}_K\|_1 \right\}
\end{aligned}$$

210 Eq. (43) can thus be written as:

$$\begin{aligned}
& \sum_{t \in L_\epsilon} (E_{\bar{\mathbf{X}}_K^t}^{M_t}[Y | \bar{\mathbf{S}}_K^t] - E_{\bar{\mathbf{X}}_K^t}[Y | \bar{\mathbf{S}}_K^t]) \\
&\leq \sum_{t \in L_\epsilon} \min \left\{ 2\sqrt{2 \log(2K|\mathcal{S}||\mathcal{X}|T/\delta)} \frac{1}{\sqrt{\max\{1, N^t(\bar{\mathbf{S}}_K^t, \bar{\mathbf{X}}_K^t)\}}}, \|\mathbf{c}_K\|_1 \right\} \\
&\leq \min \left\{ \sum_{t \in L_\epsilon} 2\sqrt{2 \log(2K|\mathcal{S}||\mathcal{X}|T/\delta)} \frac{1}{\sqrt{\max\{1, N^t(\bar{\mathbf{S}}_K^t, \bar{\mathbf{X}}_K^t)\}}}, \sum_{t \in L_\epsilon} \|\mathbf{c}_K\|_1 \right\}.
\end{aligned}$$

211 The last step follows from Eqs. (17) and (40). From results in [4, D], we have

$$\begin{aligned} & \sum_{t \in L_\epsilon} (E_{\tilde{\mathbf{X}}_K^t} [Y | \bar{\mathbf{S}}_K^t] - E_{\tilde{\mathbf{X}}_K^t} [Y | \bar{\mathbf{S}}_K^t]) \\ & \leq \min \left\{ 2(\sqrt{2} + 1) \sqrt{2T_\epsilon |\bar{\mathbf{S}}| |\bar{\mathbf{X}}| \log(2K |\bar{\mathbf{S}}| |\bar{\mathbf{X}}| T/\delta)}, \|\mathbf{C}_K\|_1 T_\epsilon \right\}. \end{aligned} \quad (45)$$

212 Eqs. (44) and (45) together give:

$$\begin{aligned} R_\epsilon(T) & \leq K \sqrt{6T_\epsilon \log(2T/\delta)} + \sqrt{\frac{3T_\epsilon \log(2T/\delta)}{2}} \\ & + \min \left\{ (K-1)2(\sqrt{2} + 1) \sqrt{6T_\epsilon |\bar{\mathbf{S}}| |\bar{\mathbf{X}}| \log(2K |\bar{\mathbf{S}}| |\bar{\mathbf{X}}| T/\delta)}, \sum_{k=1}^{K-1} \|\mathbf{C}_k\|_1 T_\epsilon \right\} \\ & + \min \left\{ 2(\sqrt{2} + 1) \sqrt{2T_\epsilon |\bar{\mathbf{S}}| |\bar{\mathbf{X}}| \log(2K |\bar{\mathbf{S}}| |\bar{\mathbf{X}}| T/\delta)}, \|\mathbf{C}_K\|_1 T_\epsilon \right\}. \end{aligned} \quad (46)$$

213 A quick simplification gives:

$$R_\epsilon(T) \leq \min \left\{ 12K \sqrt{|\mathbf{S}| |\mathbf{X}| T_\epsilon \log(2K |\mathbf{S}| |\mathbf{X}| T/\delta)}, \|\mathbf{C}\|_1 T_\epsilon \right\} + 4K \sqrt{T_\epsilon \log(2T/\delta)}. \quad \square$$

214 **Theorem 7.** Fix a  $\delta \in (0, 1)$ . With probability of at least  $1 - \delta$ , it holds for any  $T > 1$ , the regret of  
215  $\text{UC}^c$ -DTR with parameter  $\delta$  and causal bounds  $\mathbf{C}$  is bounded by

$$R(T) \leq \min \left\{ 12K \sqrt{|\mathbf{S}| |\mathbf{X}| T \log(2K |\mathbf{S}| |\mathbf{X}| T/\delta)}, \|\mathbf{C}\|_1 T \right\} + 4K \sqrt{T \log(2T/\delta)}.$$

216 *Proof.* Fix  $\epsilon = 0$ . Naturally,  $T_\epsilon = T$  and  $R_\epsilon(T) = R(T)$ . By Lem. 5,

$$R(T) \leq \min \left\{ 12K \sqrt{|\mathbf{S}| |\mathbf{X}| T \log(2K |\mathbf{S}| |\mathbf{X}| T/\delta)}, \|\mathbf{C}\|_1 T \right\} + 4K \sqrt{T \log(2T/\delta)}. \quad \square$$

217 **Theorem 8.** For any  $T \geq 1$ , with parameter  $\delta = \frac{1}{T}$  and causal bounds  $\mathbf{C}$ , the expected regret of  
218  $\text{UC}^c$ -DTR is bounded by

$$E[R(T)] \leq \max_{\pi \in \Pi_{\bar{\mathbf{C}}}^-} \left\{ \frac{33^2 K^2 |\mathbf{S}| |\mathbf{X}| \log(T)}{\Delta_\pi} + \frac{32}{\Delta_\pi^3} + \frac{4}{\Delta_\pi} \right\} + 1.$$

219 *Proof.* Let  $\tilde{R}_\epsilon(T)$  denote the regret cumulated in  $\epsilon$ -good episode up to  $T$  steps. By Eqs. (41) and (46),

$$\begin{aligned} E[R(T)] & \leq E[R_\epsilon(T) I_{M^* \in \mathcal{M}_t^c}] + E[\tilde{R}_\epsilon(T) I_{M^* \in \mathcal{M}_t^c}] + \sum_{t=1}^T P(M \notin \mathcal{M}_t^c) \\ & \leq \min \left\{ 12K \sqrt{|\mathbf{S}| |\mathbf{X}| T \log(2K |\mathbf{S}| |\mathbf{X}| T/\delta)}, \|\mathbf{C}\|_1 T \right\} + 4K \sqrt{T \log(2T/\delta)} \\ & + E[\tilde{R}_\epsilon(T) I_{M^* \in \mathcal{M}_t^c}] + \frac{\delta}{T} \\ & \leq 23K \sqrt{|\mathbf{S}| |\mathbf{X}| T_\epsilon \log(T/\delta)} + E[\tilde{R}_\epsilon(T) I_{M^* \in \mathcal{M}_t^c}] + \frac{\delta}{T} \end{aligned}$$

220 Fix  $\delta = \frac{1}{T}$ , it is immediate from Eq. (28) that

$$E[R(T)] \leq \frac{23^2 K^2 |\mathbf{S}| |\mathbf{X}| \log(T^2)}{\epsilon} + E[\tilde{R}_\epsilon(T) I_{M^* \in \mathcal{M}_t^c}] + 1. \quad (47)$$

221 Note that when  $M^* \in \mathcal{M}_t^c$ , the maximal expected reward of any  $\pi_t$  over all instances in the family  
222 of DTRs  $\mathcal{M}_t^c$  must be no less than the true optimal value  $V_{\pi^*}(M^*)$ . In words,  $\Pi_{\bar{\mathbf{C}}}^-$  is the effective  
223 policy space of  $\text{UC}^c$ -DTR procedure. Let  $\Delta = \arg \min_{\pi \in \Pi_{\bar{\mathbf{C}}}^-} \Delta_\pi$ . Fix  $\epsilon = \frac{\Delta}{2}$ , Eq. (47) implies:

$$E[R(T)] \leq \frac{33^2 K^2 |\mathbf{S}| |\mathbf{X}| \log(T)}{\Delta} + E[\tilde{R}_{\frac{\Delta}{2}}(T) I_{M^* \in \mathcal{M}_t^c}] + 1.$$

224 Among quantities in the above equation,  $E[\tilde{R}_{\frac{\Delta}{2}}(T) I_{M^* \in \mathcal{M}_t^c}]$  can be bounded following a similar  
225 procedure in the proof of Thm. 2, which proves the statement.  $\square$

## Appendix II. Estimation of Causal Bounds

The bounds developed in the main text are functions of the observational distribution  $P(\bar{s}_K, \bar{x}_K, y)$  which is identifiable by the sampling process, and so can be estimated consistently. Bounding causal effects from a finite set of observations is more involved, due to the issues of sampling variability. We now present efficient methods to address these issues.

Given a finite set of observational samples  $\{\bar{S}_K^i, \bar{X}_K^i, Y^i\}_{i=1}^n$ , let  $\hat{P}(\bar{s}_K, \bar{x}_K)$  denote the sample mean estimate of  $P(\bar{s}_K, \bar{x}_K)$ . Fix  $\delta \in (0, 1)$ . W.p. at least  $1 - \delta$ , the L1-deviation of the true distribution  $P(\bar{s}_K, \bar{x}_K)$  and the empirical distribution  $\hat{P}(\bar{s}_K, \bar{x}_K)$  over state-action domains  $\mathcal{S} \times \mathcal{X}$  from  $n$  samples is bounded according to [9] by

$$\|P(\cdot) - \hat{P}(\cdot)\|_1 \leq \sqrt{2|\mathcal{S}||\mathcal{X}| \log(2/\delta)/n}. \quad (48)$$

We could derive confidence bounds of probabilities  $P_{\bar{x}_k}(s_{k+1}|\bar{s}_k)$  for all  $k = 1, \dots, K - 1$  w.p.  $1 - \delta$  by optimizing the causal bounds  $[a_{\bar{x}_k, \bar{s}_k}(s_{k+1}), b_{\bar{x}_k, \bar{s}_k}(s_{k+1})]$  subject to convex polytope defined in Eq. (48) and probabilistic constraints  $P(\bar{s}_K, \bar{x}_K) \in [0, 1]$  and  $\sum_{\bar{s}_K, \bar{x}_K} P(\bar{s}_K, \bar{x}_K) = 1$ . The objective functions in Eq. (9) are ratios of linear functions, leading to a linear-fractional program (LFP). A LFP can be transformed into an equivalent linear program (LP) by [2], which is solvable using standard LP algorithms. The expected reward  $E_{\bar{x}_K}[Y|\bar{s}_K]$  could be bounded following a similar procedure.

## Appendix III. Experimental Setup

In this section, we provide details about the setup of experiments in the main text. For all experiments, we test sequentially randomized trials (*rand*), UC-DTR algorithm (*uc-dtr*) and the causal UC-DTR (*uc<sup>c</sup>-dtr*) with causal bounds derived from  $1 \times 10^5$  observational samples. Each experiment lasts for  $T = 1.1 \times 10^4$  episodes. The parameter  $\delta = 1/KT$  for *uc-dtr* and *uc<sup>c</sup>-dtr* where  $K$  is the total stages of interventions. For all algorithms, we measure their cumulative regret over 200 repetitions.

**Random DTRs** We generate 200 instances of the counterfactual DTR defined in Def. 1. We assume treatments  $X_1, X_2$ , states  $S_1, S_2$  and primary outcome  $Y$  are all binary variable. The probabilities of the counterfactual distribution  $P(s_1, x_1, s_{2_{x_1}}, x_{2_{x_1}}, y_{\bar{x}_2})$  are drawn uniformly at random over  $[0, 1]$ .

**Cancer Treatment** We test the survival model of patients inspired by the two-stage clinical trial conducted by the Cancer and Leukemia Group B [5, 8]. Protocol 8923 was a double-blind, placebo controlled two-stage trial reported by [7] examining the effects of infusions of granulocyte-macrophage colony-stimulating factor (GM-CSF) after initial chemotherapy. Patients were randomized initially to GM-CSF or placebo following standard chemotherapy. Later, patients meeting the criteria of complete remission were offered a second randomization to one of two intensification treatments.

We will describe this treatment procedure using the DTR with  $K = 2$ .  $X_1, X_2 \in \{0, 1\}$  represent treatments;  $S_1 = \emptyset$  and  $S_2$  indicates the observed remission after the first treatment (0 stands for no remission and 1 for complete remission);  $Y$  indicates the survival of patients at the time of recording. The exogenous variable  $U$  is the age of patients where  $U = 1$  if the patient is old and  $U = 0$  otherwise. Values of  $U$  are drawn from a distribution  $P(u)$  where  $P(U = 1) = 0.2358$ . Values of  $S_2$  are drawn from a distribution  $P_{x_1}(s_2)$  described in Table 1.

|         | $X_1 = 0$ | $X_1 = 1$ |
|---------|-----------|-----------|
| $U = 0$ | 0.8101    | 0.0883    |
| $U = 1$ | 0.7665    | 0.2899    |

Table 1: Probabilities of the distribution  $P(S_2 = 1|u, x_1)$ .

Let  $T_1, T_2$  denote the potential survival time induced by treatment  $X_1, X_2$  respectively. Values of  $T_1, T_2$  are decided by functions defined as follows:

$$T_1 \leftarrow \min\{(1 - S_2)T_1^* + S_2(T_2^* + T_3^*), L\}, \quad T_2 \leftarrow \min\{(1 - S_2)T_1^* + S_2(T_2^* + T_4^*), L\}$$

where  $L = 1.5$ . Let  $\exp(\beta)$  denote an exponential distribution with mean  $1/\beta$ . Values of  $T_1^*, T_2^*, T_3^*$  are drawn from exponential distributions defined as follows:

$$T_1^* \sim \exp(\beta_{u,x_1}^1), \quad T_2^* \sim \exp(\beta_{u,x_1}^2), \quad T_3^* \sim \exp(\beta_{u,x_1}^3)$$

Given  $T_3^*$ , values of  $T_4^*$  are drawn from distribution

$$T_4^* \sim \exp(\beta_{u,x_1}^3 + \beta_{u,x_1}^4 T_3^*).$$

The total survival time  $T$  of a patient is decided as follows:

$$T \leftarrow (1 - S_2)T_1 + S_2(1 - X_2)T_1 + S_2X_2T_2.$$

The parameters  $\beta_{u,x_1} = (\beta_{u,x_1}^1, \beta_{u,x_1}^2, \beta_{u,x_1}^3, \beta_{u,x_1}^4)$  are described in Table 2.

|         |           | $\beta_{u,x_1}^1$ | $\beta_{u,x_1}^2$ | $\beta_{u,x_1}^3$ | $\beta_{u,x_1}^4$ |
|---------|-----------|-------------------|-------------------|-------------------|-------------------|
| $U = 0$ | $X_1 = 0$ | 4.3063            | 4.9607            | 0.8737            | 4.2538            |
|         | $X_1 = 1$ | 0.8286            | 8.2074            | 8.7975            | 7.6468            |
| $U = 1$ | $X_1 = 0$ | 2.6989            | 0.0235            | 5.9835            | 6.8059            |
|         | $X_1 = 1$ | 3.6036            | 1.1007            | 9.4426            | 7.3960            |

Table 2: Parameters  $\beta_{u,x_1}$ .

The primary outcome  $Y$  is the survival of the patient at the time of observation  $t = 1$ . Values of  $Y$  are decided by the indicator function  $Y \leftarrow I_{T>1}$ .

We generate the confounded observational data following a sequence of decision rules  $X_1 \sim \pi_1(X_1|U)$ ,  $X_2 \sim \pi_2(X_2|U, X_1, S_2)$ . The policy  $\pi_1(X_1|U)$  is a conditional distribution mapping from  $U$  to the domain of  $X_1$  where  $\pi_1(X_1 = 1|U = 0) = 0.5102$  and  $\pi_1(X_1 = 1|U = 1) = 0.2433$ . Similarly,  $\pi_2(X_2|U, X_1, S_2)$  is a conditional distribution mapping from  $U, X_1, S_2$  to the domain of  $X_2$ ; Table 3 describes its parametrization.

|         | $X_1 = 0$ |           | $X_1 = 1$ |           |
|---------|-----------|-----------|-----------|-----------|
|         | $S_2 = 0$ | $S_2 = 1$ | $S_2 = 0$ | $S_2 = 1$ |
| $U = 0$ | 0.2173    | 0.8696    | 0.6195    | 0.4641    |
| $U = 1$ | 0.8869    | 0.0103    | 0.5314    | 0.4339    |

Table 3: Probabilities of  $\pi_2(X_2 = 1|U, X_1, S_2)$ .

## References

- [1] P. Auer, N. Cesa-Bianchi, Y. Freund, and R. E. Schapire. The nonstochastic multiarmed bandit problem. *SIAM journal on computing*, 32(1):48–77, 2002.
- [2] A. Charnes and W. W. Cooper. Programming with linear fractional functionals. *Naval Research logistics quarterly*, 9(3-4):181–186, 1962.
- [3] W. HOEFFDING. Probability inequalities for sums of bounded random variables. *J. Am. Stat. Associ.*, 58(301):13–30, 1963.
- [4] T. Jaksch, R. Ortner, and P. Auer. Near-optimal regret bounds for reinforcement learning. *Journal of Machine Learning Research*, 11(Apr):1563–1600, 2010.
- [5] J. K. Lunceford, M. Davidian, and A. A. Tsiatis. Estimation of survival distributions of treatment policies in two-stage randomization designs in clinical trials. *Biometrics*, 58(1):48–57, 2002.
- [6] J. Pearl. *Causality: Models, Reasoning, and Inference*. Cambridge University Press, New York, 2000. 2nd edition, 2009.
- [7] R. M. Stone, D. T. Berg, S. L. George, R. K. Dodge, P. A. Paciucci, P. Schulman, E. J. Lee, J. O. Moore, B. L. Powell, and C. A. Schiffer. Granulocyte–macrophage colony-stimulating factor after initial chemotherapy for elderly patients with primary acute myelogenous leukemia. *New England Journal of Medicine*, 332(25):1671–1677, 1995.

- 294 [8] A. S. Wahed and A. A. Tsiatis. Optimal estimator for the survival distribution and related  
295 quantities for treatment policies in two-stage randomization designs in clinical trials. *Biometrics*,  
296 60(1):124–133, 2004.
- 297 [9] T. Weissman, E. Ordentlich, G. Seroussi, S. Verdu, and M. J. Weinberger. Inequalities for the 11  
298 deviation of the empirical distribution. 2003.
